# Supplementary material for: A re-annotation of the Anopheles darlingi mobilome
Source: PubMed Central journal article supplement (PMC6428116; doi:10.1590/1678-4685-gmb-2017-0300), 2019-01-21
Supplement: 1415-4757-GMB-1678-4685-GMB-2017-0300-s001.pdf [file 1415-4757-GMB-1678-4685-GMB-2017-0300-s001.pdf]

## Supplementary Material “A re-annotation of the *Anopheles darlingi* mobilome”

**Table S1** - Comparison of genome size and TEs contents in *Anopheles* genus

| Species                   | genome size   | % of TEs     | source |
|---------------------------|---------------|--------------|--------|
| <i>A. albimanus</i>       | 170.5         | 1.98         | 1      |
| <i>A. arabiensis</i>      | 246.6         | 9.38         | 1      |
| <i>A. christyi</i>        | 172.7         | 2.81         | 1      |
| <i>A. darlingi</i>        | 173.9         | 2.29 / 5.61* | 2/ *3  |
| <i>A. dirus</i>           | 216.3         | 5.09         | 1      |
| <i>A. epiroticus</i>      | 223.5         | 6.27         | 1      |
| <i>A. funestus</i>        | 225.2         | 4.03         | 1      |
| <i>A. gambiae</i>         | 273.1 / 236.4 | 17.78        | 1      |
| <i>A. quadriannulatos</i> | 283.8         | 7.69         | 1      |
| <i>A. melas</i>           | 227.4 / 224.2 | 7.29         | 1      |
| <i>A. merus</i>           | 251.8 / 288.0 | 11.43        | 1      |
| <i>A. stephensis</i>      | 221.3 / 225.4 | 5.04         | 1      |

Sources:

<sup>1</sup>Neafsey DE, Waterhouse RM, Abai MR, Aganezov SS, Alekseyev MA, Allen JE, Amon J, Arcá B, Arensburger P *et al.* (2015) Highly evolvable malaria vectors: The genomes of 16 *Anopheles* mosquitoes. *Science* 347:1258522.

<sup>2</sup>Marinotti O, Cerqueira GC, de Almeida LG, Ferro MI, Loreto EL, Zaha A, Teixeira SM, Wespiser AR, Almeida E, Silva A, Schlindwein AD, *et al.* (2013) The Genome of *Anopheles darlingi*, the main Neotropical malaria vector. *Nucleic Acids Res* 41:7387-7400.

<sup>3</sup>This study.
