# Supplementary material for: A re-annotation of the Anopheles darlingi mobilome
Source: PubMed Central journal article supplement (PMC6428116; doi:10.1590/1678-4685-gmb-2017-0300), 2019-01-21
Supplement: 1415-4757-GMB-1678-4685-GMB-2017-0300-s002.pdf [file 1415-4757-GMB-1678-4685-GMB-2017-0300-s002.pdf]

## Supplementary Material “A re-annotation of the *Anopheles darlingi* mobilome”

**Table S2** - Percentage of genome occupied by main TE superfamilies in studied species of the *Anopheles* genus.

|                        | <i>An darlingi</i> | <i>An gambiae</i> | <i>An arabiensis</i> | <i>An quadriaanulatus</i> | <i>An melas</i> | <i>An merus</i> | <i>An christyl</i> | <i>An epiroticus</i> | <i>An dirus</i> | <i>An stephensi</i> | <i>An funestus</i> | <i>An albimanus</i> |
|------------------------|--------------------|-------------------|----------------------|---------------------------|-----------------|-----------------|--------------------|----------------------|-----------------|---------------------|--------------------|---------------------|
| <b>LTR</b>             | <b>1.40</b>        | <b>3.94</b>       | <b>1.29</b>          | <b>0.77</b>               | <b>0.66</b>     | 2.56            | 0.08               | 1.22                 | <b>0.65</b>     | <b>0.21</b>         | <b>0.50</b>        | <b>0.15</b>         |
| Pao-Bel                | 0.06               | 1.60              | 0.57                 | 0.29                      | 0.24            | 0.97            | 0.01               | 0.65                 | 0.23            | 0.05                | 0.12               | 0.01                |
| Copia                  | 0.74               | 0.40              | 0.18                 | 0.15                      | 0.12            | 0.28            |                    | 0.07                 | 0.06            | 0.04                | 0.13               |                     |
| Gypsy                  | 0.75               | 1.41              | 0.54                 | 0.31                      | 0.30            | 1.26            | 0.01               | 0.39                 | 0.32            | 0.11                | 0.14               | 0.11                |
| <b>Non-LTR</b>         | <b>1.25</b>        | <b>3.48</b>       | <b>1.72</b>          | <b>1.35</b>               | <b>1.31</b>     | <b>2.16</b>     | <b>0.38</b>        | <b>1.34</b>          | <b>1.07</b>     | <b>1.52</b>         | <b>0.64</b>        | <b>0.25</b>         |
| LINE                   | 0.15               | 1.67              | 0.63                 | 0.49                      | 0.78            | 0.85            | 0.01               | 0.16                 | 0.57            | 0.12                | 0.03               | 0.03                |
| Jockey                 | 0.35               | 0.48              | 0.33                 | 0.26                      | 0.27            | 0.33            |                    | 0.04                 | 0.02            | 0.03                | 0.01               | 0.01                |
| R1                     | 0.37               | 0.24              | 0.01                 | 0.08                      | 0.08            | 0.15            |                    | 0.06                 | 0.06            |                     | 0.08               | 0.08                |
| SINE                   | 0.11               | 0.43              | 0.51                 | 0.45                      | 0.47            | 0.21            | 0.39               |                      | 0.08            | 1.34                | 0.36               |                     |
| <b>DNA-transposons</b> | <b>2.44</b>        | <b>1.21</b>       | <b>0.73</b>          | <b>0.39</b>               | <b>0.42</b>     | <b>0.90</b>     | <b>0.10</b>        | <b>0.32</b>          | <b>0.26</b>     | <b>0.13</b>         | <b>0.14</b>        | <b>0.40</b>         |
| Tc1-mariner            | 1.06               | 0.59              | 0.48                 | 0.21                      | 0.22            | 0.29            | 0.03               | 0.22                 | 0.12            | 0.10                | 0.06               | 0.28                |
| P                      |                    | 0.02              | 0.01                 |                           | 0.01            | 0.02            |                    | 0.01                 |                 |                     |                    |                     |
| hAT                    | 0.41               | 0.02              | 0.02                 | 0.01                      | 0.01            | 0.02            | 0.05               |                      | 0.01            | 0.02                |                    | 0.01                |
| pyggyBac               |                    | 0.02              | 0.01                 | 0.01                      | 0.01            | 0.02            |                    | 0.01                 | 0.03            | 0.01                |                    |                     |
| helitron               | 0.11               | 0.05              |                      | 0.01                      | 0.01            | 0.03            |                    |                      |                 |                     |                    |                     |
| <b>Total TE</b>        | <b>5.67</b>        | <b>17.78</b>      | <b>9.38</b>          | <b>7.69</b>               | <b>7.29</b>     | <b>11.61</b>    | <b>2.81</b>        | <b>6.27</b>          | <b>5.09</b>     | <b>5.04</b>         | <b>4.03</b>        | <b>1.98</b>         |

Sources:

<sup>1</sup>Neafsey DE, Waterhouse RM, Abai MR, Aganezov SS, Alekseyev MA, Allen JE, Amon J, Arcá B, Arensburger P *et al.* (2015) Highly evolvable malaria vectors: The genomes of 16 *Anopheles* mosquitoes. *Science*, 347:1258522. Observation: Some families were joined into superfamilies

<sup>2</sup>This study.
