# Supplementary material for: A re-annotation of the Anopheles darlingi mobilome
Source: PubMed Central journal article supplement (PMC6428116; doi:10.1590/1678-4685-gmb-2017-0300), 2019-01-21
Supplement: 1415-4757-GMB-1678-4685-GMB-2017-0300-s003.pdf [file 1415-4757-GMB-1678-4685-GMB-2017-0300-s003.pdf]

## Supplementary Material “A re-annotation of the *Anopheles darlingi* mobilome”

**List S1** - Description of 36 “full length” transposable elements found in the *Anopheles darlingi* genome.

The “full length” elements or elements large enough to deserve a detailed analysis were separated; 36 are described below.

### *Abbreviations*

bp – base pairs

Kb – kilo base pairs (1000 nucleotides)

TIR – Terminal inverted repeat

TSD – Target sequence duplication

ORF – Open Reading frame

### *1 – Mariner1-Andl*

#### **Degenerated element**

#### *Short description*

A total of 190 copies of this element were found in the *An. darlingi* genome, the larger showing 907 bp. TIRs were not found. TSD containing TA sequence were observed. The ORF finder found 8 ORFs, indicating this element is not able to produce active enzymes. Only Orf 8 has a significant hit with transposase.

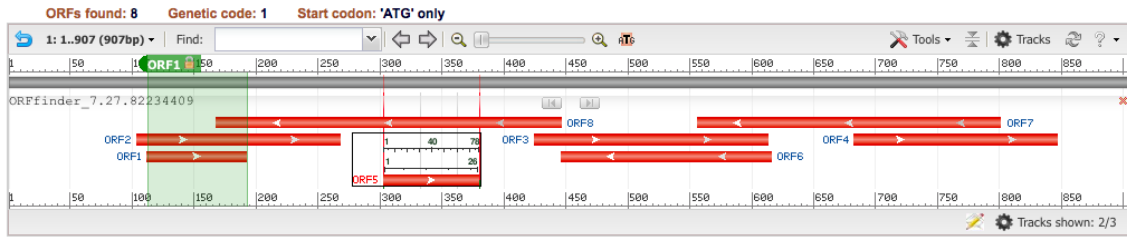

**Figure 1-** Orf Finder scheme for ORFs detected in the *Mariner1-Andl* element

Orf 8 92 aa (Blast hit: putative DD34D transposase [*Bactrocera tryoni*]/ Histone-lysine N-methyltransferase SETMAR)

>|c|ORF8

MILAYQTYPPITFGRMFFISSASALDHDNAPSHTSLVFCDFANIFTHIV  
 PIKPYAPDLVTFGFWLLDKPKISFRGHCFDTIEQIQAAAKRC

>|1 Mariner1-Andl (sequence)

CTACTGTGTCCAAAATAAGGTGACATTAGATTTATTTTGAAAATTCCTTAATT  
 TTTCTTCCAAATCATTTTTTTGCCATCAAAGTAATCCCTCCCAGACACAATGC  
 ACTTATGCCGACGAATTTCCAGTTTTTCGAAACACGTGAAAATGTCTTTAGGA  
 ATGGCCTTCAGCACCTTTTCGCAGCGGCTTGAATCTGCTCTATCGTGTCAAAA  
 CAGTGTCCCCGGAACGAAATTTGGGCTTGTCTAATAGCCAGAAGCCAAATG  
 TAACCAAATCAGGCGCATAACGGTTTTATTGGAACGATATGAGTGAAAATATTG  
 GCAAAAAGTCACAGAAAACCAACGAAGTGTGAGATGGTGCATTATCGTGA  
 TCGAGCGCTGACGCGCTTGAGATGAAAACATCCTTCCAAATGTAATTGGCG  
 GATATGTTTGATATGCCAATATCATCAGCAAAGTCTTGTGTTAATCGACGG  
 TTTTCCAACACCAAATCTTTGAGTTTTTTGGCGTGAGCTGCATCGATTGACGTT  
 GGTGGTCGTCCAGGGCGTTCTTCCTCTTCAAACGTTCCCGACCCTCCTGGA  
 AGTCTTTGCACCACCTGTAAATATTTTTTTTGACATAGTATTGTCACCAAAGAC  
 TTTCTGTACATTGGCATTGGTGTATCCGCAGCAGAAAAAATATTTTAATGCA  
 AATTCTTTGCTTAAAACTTGCGACATGGCGAAAAACGAAGAATGCACTTTT  
 AGCAGTTCACAAAAAATACGTATCTCAAACACTAGTGAATATTTTGACGTGA

AACTTGTCATGGTTGTCAATAACAGTGCTGACAACCTACAAAAATACAAA  
 TTAAAGATATCCCTTTACGCGGGCAATTTGGACACCGTGTCACCTTACTTTTT  
 GGACACAGTAG

## 2 *Mariner2-Andl*

### *Degenerated element*

#### *Short description*

A total of 32 copies of this element were found in the *An. darling* genome, the larger showing 941 bp. TIRs were not found but TSD consisting TA nucleotide were observed. The ORF finder found 7 short ORFs, indicating this element is not able to produce active enzymes.

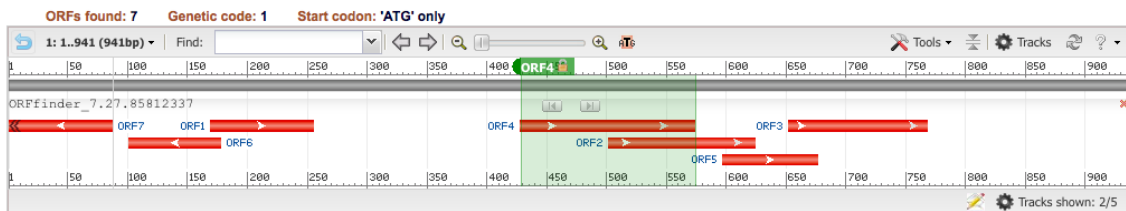

**Figure 2** - Orf Finder scheme for ORFs detected in the *Mariner2-Andl* element

> *Mariner2-Andl* (sequence)

CACCGTGTCCAATATATTCTCATACAAATTTTTGCTGAACGTTTTGCTGGATT  
 TTGTATATTTACAGCACCTAGCTCAAGTATCATATTTTCTGTAAACTAGTGTTT  
 ACTTAGTATTTTGAGAGTTGGATTGGTCTGTTTTCTGTTGGTGGTCGATTTTAG  
 TAACGATGAAATCATTACGTGCCTGTGTTTTAAAAATCTATCTCGACACGCTG  
 ACGAGACTTTGTGTTTTTAGTGAAAATTTTGTCTAAGCAAGTCATAATGT  
 CAAAACGATAGATTGTGGCCAGAAACATCAAGGATGTAACAGATAATCAA  
 GAACATCCCATTTCAAATGTGGCTAGTATGAAGGGTAGGGTGGTATTTGCA  
 AGCGCGACAAGTTACCCCTAATTTTTATTGAAAAAGGCATAAAAATTA  
 ACTCAATGTATTATAAAACAGAAGTTTTAGAGAAAGTGGTGAAACCTACA  
 ATTGGAAAGATTGTACGGGGACGACGATTATGTGCGTTCCAGCAAGATGGAGCGCCCTC  
 GCACACAGCGAATTTGTCCAAGACTGGTGCAGGAACAATTTAACCAGATTG  
 AAGCGAAGAATGAATGGCTCCCAGTTCACCAGAAATCTTAACCCACTGGACT

TTTTCGTTGGTCGTACATGTTATCAATACTAAACGACCATAAACTGTCCAGTTT  
 GATACAATTCAAAGCAACGATAAATAAAATTTGGATGAAATGCCTATGGAAGT  
 CGTCCGTGCCCCGTGCGATGGGTTTGAGAAGCGATTGAAGCTAGTAAAAAAA  
 AGTTGGGGGCGAGTAATTTGAAACATATTTTATAATTAATTAATATAAGTTTC  
 TTAATAAAAAAACGCTCGGATTAAAAAAATGGCCCAATCCTTTAAGAAAA  
 TATAGATGATTGAAGTTGTATGAGAATATATTGGACACGGTG

### 3 – *Mariner3-Andl*

#### *Degenerated element*

#### *Short description*

A total of 28 copies of this element were found in the *An. darling* genome, the larger showing 1265 bp. TIRs were not found but TSD consisting TA nucleotide were observed. The ORF finder found 14 short ORFs, indicating this element is not able to produce active enzymes.

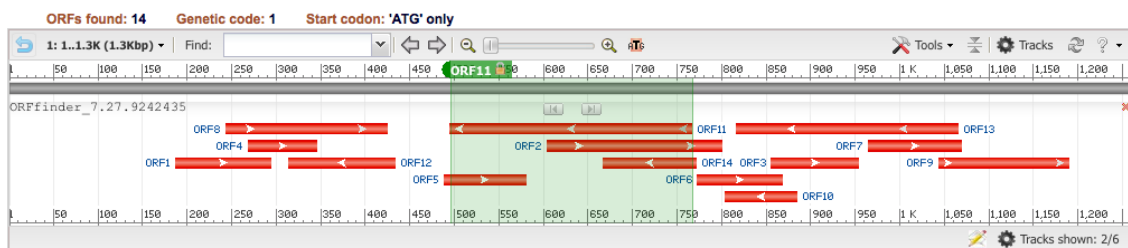

**Figure 3** - Orf Finder scheme for ORFs detected in the *Mariner3-Andl* element

#### > *Mariner3-Andl* (sequence)

TTGGGTCGTCGAAAAAGTCTTTTCGTATTTGGCAATAGGTGTCTTTGAAGTC  
 GTCTACCTCCACCGTGTTTATCACATTATCTCATAAATACGGGGGCGTTTTGGG  
 TGACATTTCAAGTGTCATTTAGTCAAAAACAAAACATAATTTGGAGAAGTTTC  
 AAAAAAGTTATAGCTGTTCAAAAATGTATGAAAATAATGAAAAATTCGCTAGA  
 TTTTGAAATTATTTTAAAAAAGGGAAGAATGCCCGCAAGCCACCAATCAA  
 TTTTATGTTTACGGGGACGATGCTCTATAGTTGGTATAGCACAAATGGCTCACT  
 CGCCTCCGTTCTGAAATTTTCGATGTGAAAGATGCACTCCATCTGGTCGACCT

ATCGTTGCAAAAGTTGATGAAATTTTAGAAAAGATTGACCAGACCGTCACAT  
AAGCAGTCATGACATAGCCAAGGAACTAACATTCATCATAAACCGGCTTTG  
GTCCATTTAAAAATGCTGGCTACAAAAAGAAGCTCGATGTTGGATACACATG  
AATTGTCTGGAAAATTTTATTGGACTGAATTAACATCTGCGATTGTTTACTGAA  
ACGAAATGAAATCGAACCATTCATGAAGCAAATGGTAACAGGAGTCGAAAA  
GTGGATCAAATACGACAATAATGTGCGAAAAAGATCATGGTGCAAAAAAGGT  
GAAGCTAAACAAACGGCCCCAAAGCCAGGATTGATGCCGAAAAAGGTTATG  
CTGTGTGTTTGGTGGGATTGGAAAGGAATCATCCATTATGAGCTCTCAGCCTG  
GCCAAACGATTGAATCTACTCTTTACTGTCAACAACCTGATGAGATTGAGGCA  
AGCAATCGAGAAAAAATGCCAGAACTGATCAACAGAGAGGGGCATCGTCTTG  
CATCAGGACAACGCTAAACCTCACACATCTTTGATGACTCGCCAGAACTTGG  
AGA ACTTG TAGGGAAGTTTTGATGCATCCACCATATAGCCCTGACCTTGC ACT  
ATCGGAAAACCACTTATTTTGT TTGATCAAAAATCCCTTGATGAGTAATGCTG  
GCTTCAAGAGAAGCATGTAAAAAATACGTTTCAAAGTTTTTCACCGATAACT  
CACGGAATTTTTACACGAAAGGAATAATGTCTTCAGCCGAAAAATGGCAAAA  
GATGGCTAACCAACATGGAAAATATTTGGTTGAATAAAGTTATTTAGAAATAA  
TGAAAAAAAATCATTTGAAGTTTGATCAGAAATACGAAAAGACTTTTTTCGAC  
CACCCAA

#### ***4 – Mariner4-Andl***

##### ***Truncated element***

##### ***Short description***

A total of 44 copies of this element were found in the *An. darling* genome, the larger showing 1194 bp. TIRs were not found. However, TSDs consisting of TA were observed. The ORF finder found 9 ORFs.

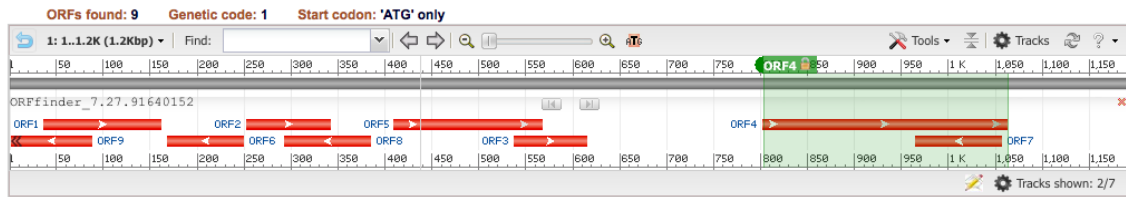

**Figure 4** - Orf Finder scheme of ORFs detected in the Mariner4\_Andl element

ORF 2

(Mariner Mos1 transposase - *Acromyrmex echinator*)

>|c|ORF2

MLVEAYGDSVLAIEITCRIVFVGSKMAILT

ORF 4

( Blast Histone-lysine N-methyltransferase SETMAR, partial *Harpegnathos saltator*)

>|c|ORF4

MTKHEKLILQRQRPSHSSKMVQNYFDTLKGRFYLTPLVLQTWLLQTITC

FRRWVSVADSTSIRMKMPENGLTSGLPHKMKNSLAW

>4 Mariner-2\_ACe

CCAGGTGTATAACCTTAAACTGCCGTTTGCTTCTAGATGGGTTTATCGAGCAA  
ATTGAGCTGTATCGACTGTCATTTTTTTTTTGCATGGGTTTCGACACCTGTTACG  
TAAATCAGTGCACATCATAAGTGATTTTCATGCAAAAACAATTTTTTCCTGCATA  
ATCATGTCTAGTTTTGTGCTAGAAAAGAGCATATCGGGAAGCTCTACTTTTT  
TGCTTTAATTTGAAGAAATCGGCTGCCGAATCCATAAAATGCTTGTAGAGGCC  
TATGGTGACAGTGTACTAGCGGAAATTACTTGCAGAATTGTTTTCGTCGGTTC  
AAAAATGGCCATTTTGACTTGAGTGACAAAAGCGTGAAAATCGACCCAGAA  
AAGTTGAGGATCATGAATTGCAGGCTCTTTTGGATAGGATGATGCCCAATCGC  
GAAAATACTTGCCAGCAGTTACGAGTTACTAAACCAGCCGTTTCCAAACA  
TTACGGGCCATGGAATGGTTAAAATTGGAAAATGGGTAACCATGAATTGAA  
CGATATGAAATGGACCCAAAACAGCGAAATTTGTTTTAGACAAAAGAATG  
TTTTCTGGTACTGCGATGAAGTGGATATATTTGAGAATCCAAAAAAAACCTG  
ATCCCGGAACCACTTCTTCCAAACAATCGCTTTGGACGCACGATGCGGC  
TTTGTGGGATAGCGGTGTGGCTACTATAGTTTAAACCTGAAGAACTGTTGCA  
TGAGCATCGCTAGCATTAAACGACTAATCAAATTGCACCTGCTTTGCATTAATA

AAGGCCAGTTATGACAAAACATGAGAAGTTGATAATTCTCCAACGACAACGC  
 CCATCGCACTCGTCAAAAATGGTCCAAAATTACTTTGATACTCAAGGGGA  
 GGTTCTACCTCACCCCGCTAGTTCTCCAGACCTGGCTCCTTCAGACTATCACC  
 TGTTTTTCGCCGATGGGTCAGCGTTGCCGACAGCACTTCGATTTCGTATGAAAAT  
 GCCTGAAAATGGCTTGACGAGTGGTTTGCCTCACAAAATGAAGAATTCTTTG  
 GCATGGTAGACACAAAGTGCCCAAAGATGGGAAAATGTGTAGCTAGCGAG  
 GGAAAATATTGGATAAATTAATTTTGGCTTCTATTTAAAAAATGTGTTTTTT  
 CGACAAAAAAAAGCAGAGTTAAGGTTATACACCTGG

### 5 – *Mariner5-Andl*

#### *Degenerated element*

#### *Short description*

A total of 91 copies of this element were found in *An. darling* genome, the larger showing 890 bp. TIR were not found but TSD consisting TA were observed. The ORF finder found 11 short ORFs, indicating this element is not able to produce active enzymes.

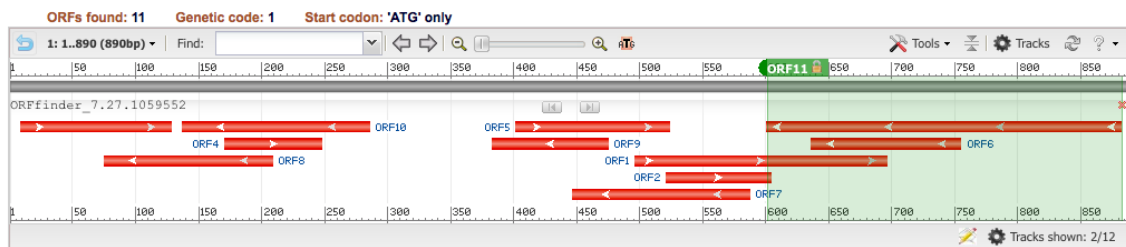

**Figure 5** - Orf Finder scheme of ORFs detected in the Mariner5\_ Andl element

> Mariner-5\_ Andl (sequence)

CCAGGTGTATGCATATGAAACCGCCCTCCGTGTTTATAGCTATATCTATGCCAA  
 ATGGAACCGTAGAACCGTTCTCAATGTTTCTTTTTGTTTCGTTTCGGCATCTGTT  
 AATCAAAATCGTGCGCAATAGTTCTAATTTCACTACAACCAATATTTTCATT  
 GTGTACAAAATGGCAAGTTCCGTCCTTAAAAGTGCAAAATGCGGACATCGTT  
 CATTTTCTGCCTCTATTTTCAAAAATAGGCGATAGAATCGCATCAAATGCTTAT  
 CGAAGCTTACGGTTAGCATGCTCTTTATGAAACACAGTGCAAAGAGTGGTTT  
 TAAAATTTAAAATGGCGATTTTGATGTGACAAACGAGAATCGCGAGAAAC  
 CACCGAAAACGTTAGAAGACACCGAATTGCATGCCGTATTGGGCGAAACGGT  
 TATTAGGAGCTATACAAGCAACACTATCGATTTCGGACCGTGAAATCCGCATA

AATCGACCGGAATATCGAAATGATAAACAGACCGATTTTGCTCGATGAAAATG  
 CTCGCCACACCGCGGAAAACCGGCCAAGAAGACTATAACAAGACCTCAATTG  
 GGATCATTATCGCTTGCGGCTAACTCACCAGACTTGGCTCTATCGAATCAAC  
 ACTCATTTCGATCGTTGGGACAGATACTGGCCGAGCAGCGCTTCCATTCTTAC  
 AAAAGTTTGAAAAAATCGACCTGTGATTGGTTTGATACAAAAGACCGACTT  
 GTTTTTTTGCGAAGCATCTGTAAATTGCCTAAAAGATAGGAAAAATGTATAGC  
 TAACTATTGCCATTTCTTTGAAGAATAAGAGTTTCTCATTTCGCAGAATAAA  
 AATTTTTTTTCTGAAAAAAAAGGCGGTTTCATATGCATACACCTGG

## 6 – *Mariner6-Andl*

### *Degenerated element*

#### *Short description*

A total of 30 copies of this element were found in *An. darling* genome, the larger showing 905 bp. TIR were not found by TSD consisting TA were observed. The ORF finder found 9 short ORFs, indicating this element is not able to produce active enzymes.

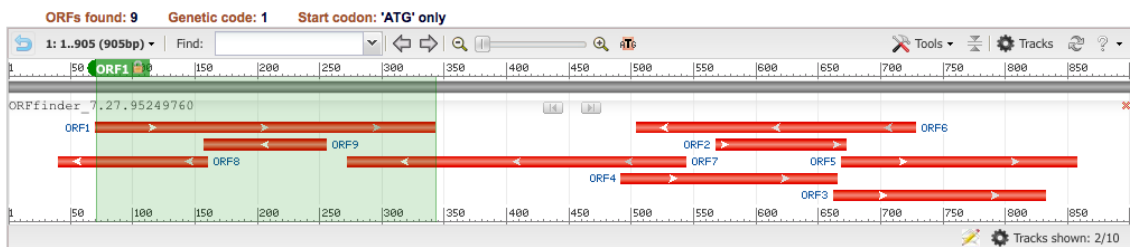

**Figure 6** - Orf Finder scheme of ORFs detected in the *Mariner6\_Andl* element

#### ORF1

(Blast Mariner Mos1 transposase -*Acromyrmex echinatior*)

>|cl|ORF1

MQNPGNYSWGICQQLPKISFVYFHSALSYSCANMAKFEPNKCHLREVLLF  
 AFHTKKNAEAHRMIVKFMVKPALVKEVSGVVLQVQKRRL

#### ORF 4

(Blast - Mariner Mos1 transposase -*Hymenolepis microstoma*)

>|cl|ORF4



MIQKLGYWVPHCLKPRDIERLRRRNHENIPGNIKMAHYPTRCTLQTSLHQ  
TTIYSDR

ORF5

( Blast - Mariner Mos1 transposase - Hymenolepis microstoma)

>|cl|ORF5

MTWPSSASVLSRTPKIGSMHGSRRKMNNFSHEEFKSCPNCGKKLWLTMAI  
TLKNEFVRGFLQ

> Mariner6\_ Andl (sequence)

TTAGGTGTACAAATAGAAACCGCCGTTTTCCCATAGGGGTCTAGCAGCTGCA  
AATTAATCGATAAAAATATGCAAACCCCTGGTAATTACAGTTGGGGCATCTGT  
CAACAAC TCCCCAAAATCTCGTTTGTTTATTTTCACTCTGCTTTGAGTTATTCA  
TGTGCGAACATGGCGAAGTTTGAGCCGAATAAGTGCCATTTGCGGGAAGTGT  
TGCTTTTTGCGTTTCATACTAAAAAAATGCAGCTGAAGCGCATCGAATGATA  
GTAAAGTTTATGGTGAAGCCTGCATTAGTGAAAGAAGTGTCGGGAGTGGTTT  
TGCAAGTTCAAAACGGCGATTATGACGTGCCAGACAAGGAGCGTCCCACA  
AAAAGTTCGAAAATGCTGAATTGAACACTTTTTTTGGAAGAAGATTCTTGTC  
AACGCAACAGGAACTTGCAGACTTATTGTGCGTGACGTAACAAGCAATATCG  
CATCGGCTAAAGCCCTGGGAATGATCCAGAACTAGGATACTGGGTGCCGCA  
CGAGTTGAAGCCGAGGGACATCGAACGGCTTCGACGGCGGAATCATGAAAA  
CATACTGGAAACATTAATAATGGCACATTACCCACCCGCTGTACTCTCCAGA  
CATCGCTCCATCAGACTACTATCTATTCCGATCGATGACGCATGACCTGGCCG  
AGCAGCGCTTCCGTTCTTTGAGGACACCCAAAATTGGATCGATGCATGGAT  
CGCGTCGAAAGATGAACAATTTTTCCACGAGGAATTCAAAGCTGCCAAA  
TTGTGGGAAAAAGTTGTGGCTAACTATGGCAATTACTTTGAAGAATGAGTTT  
GTAAGGGGTTTTTTACAATAAAGCCTCAAATCATGAGAAAAACGGCGGTTT  
TCTATTTGTACACCTGA

*7 – Mariner7-Andl*

*Degenerated element*

**Short description**

A total of 99 copies of this element were found in *An. darling* genome, the larger showing 912 bp. TIR were not found but TSD consisting TA were observed. The ORF finder found 9 short ORFs, indicating this element is not able to produce active enzymes.

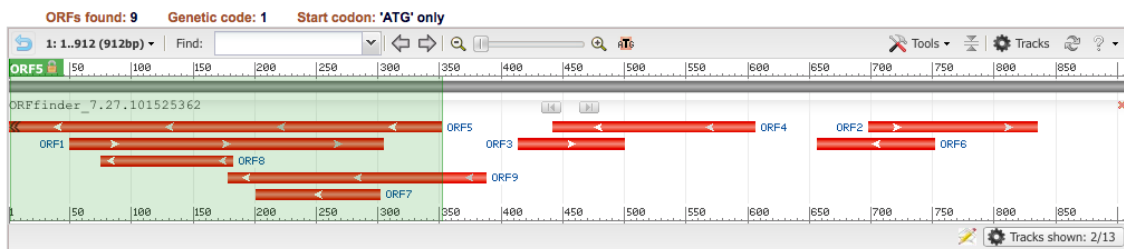

**Figure 7** - Orf Finder scheme of ORFs detected in the Mariner7\_Andl element

ORF1

(Blast - transposase -Echinococcus granulosus)

>|c|ORF1

```
MKIERSRFFSCLVGLSGIGKAPWIASLTLVSTVIILLHEVPSSFAQHII
IKFLAVEGVKLIILRRSTAYFREETLSRARVVA
```

> Mariner7\_Andl (sequence)

```
CGAGGGTGAATCAAATATAAACGAGACTTTTCGTCCTACGGTCACAAAATG
AAGATAGAACGTTCTCGCTTTTTTAGTTGTTTGGTTGGTTTGTTCAGGAATAGG
AAAAGCGCCCTGGATCGCCTCATTGACACTCTCAGTGTCCACAGTAATAATTT
TGCTGCATGAGGTACCTTCGTCATTTGCGCAACATATTATAATCAAGTTTCTCG
CCGTAGAAGGCGTAAACTGATCGAAATCTTGAGGAGATCGACTGCATACTT
CCGGGAAGAGACACTGTCGCGAGCCAGAGTGGTTGCATAGCTTAAAAAAT
CTTTTGGGTGTAATCGTGTTGAAAATGAGAGCCATAACCGCAGACCTCGCA
CCAGCCTAAGAGCGCAAACATTAATCCTTAGACGGCTTACTGAGAATGACA
GAGTCGTATCACTACAGGACAATTAATGCGACCGATTCTTGTAATGTTTTAAG
TGAGATCCGACTTGCATATCGCCTCTAAATATGGGACATATTGATAAGGGAAG
TGGTTCTTCTTCATGACAATGCTCGCCACAACACTTGCAGCCATTACTAGGG
AAAAAAAAGCAACTGAGGTGGGAAACATTGGAAACCCTCGTTACAGTCCTG
```

ACCTGTTACCCTGTGACTTTCATGTGTTTACTCTCTCAAGGAAATTTTGGGAG  
 ACAAAGATTCAACAATGATACTGAGGATGAAACCTCATTGCGCAATTGGC  
 TGCAAACACGACCAACATCTTTCTACGAGAAATATATTAATAAGCTGCCTATC  
 CGCTGGGAAAAATGTGTTTCGGAATCAGGAGATTATGTAGAAAAATAAAAAA  
 ATACCTTTTGTGCGTTTAAACTAAAAATAAATTTGCTAAAAATAAAGTCTCGT  
 TTATATTTGATTCACCCTCG

## 8 – Mariner8-Andl

### Truncated element

#### Short description

A total of 20 copies of this element were found in *An. darling* genome, the larger showing 1675 bp. TIR were not found by TSD consisting TA were observed. The ORF finder found 8 ORFs, indicating this element is not able to produce active enzymes. However, two large ORFs (148 and 141 aa) showed hits with transposase, indicating this element became degenerated recently.

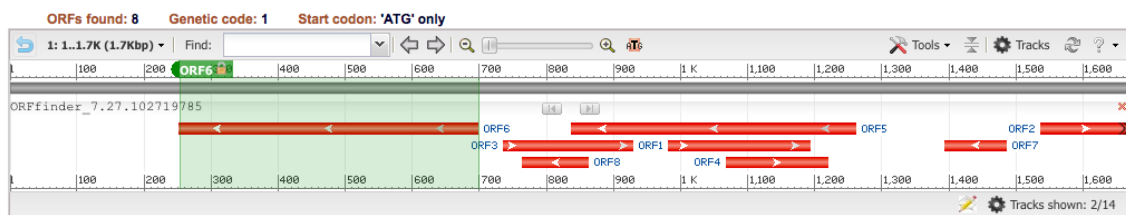

**Figure 8** - Orf Finder scheme of ORFs detected in the Mariner8\_Andl element

#### ORF6

(Blast -Transposable element Tcb1 transposase, partial - *Camponotus floridanus*)

>|cl|ORF6

MGWGSFSWAGVGNLVHIIHGIMTSDVYIDILKGNLTNSARRAGLRRHFILQ  
 QNDPKHTAKKTTAFLRSRSVKMLEWPSQSPDLNPIENLWALLDRKVVKD  
 NVTSKESYIHALQEAWATIEPTHLQNLVNSMPKRLQMVIEAKGSHINY

ORF 5

(Blast - transposable element tcb1 transposase -*Lasius niger*)

>|cl|ORF5

MGGKKISLQVRNLVLKDNFNVSQRKIAEKFSISRGAVRAIIAKHRIFGS  
VNDRSKTGRPRKTDHRMDVRIIREIKKSPKTTIRSIKESLSLSISDRTIR  
RRLVQHGYESRLAKRRPFISKKNKLRLEFARKYVSKTKEF

> Mariner8\_ Andl (sequence)

CAGTGACCGGCATAAGTAAAAGCCCACCCCTAGTTTTTTGTACATTTTCGCCT  
GTAAATCCAACAATTTTGGTCGCAAAGGCAAGTGTTATGTTCTTATAGAAGG  
TTAACATTCCCTCTTTCAGATTCACCTGCTTTCATCTCGATTGGATTATAACTT  
TTTTTTGAAAATTCTTTGAGTGAGAGATGGTCGAGCATGATTATGACAACAGT  
AAAAGCCCATACGTATTAATATGTTATTATTTATTTATTAATAGTTAATATGGCTT  
CCCTTAGCCTCAATCACCATCTGCAAACGTTTTTGGCATGCTGTTTACAAGATT  
TTGTAGATGTGTTGGCTCGATTGTTGCCATGCTTCTTGTAGAGCATGAATATA  
TGATTCTTTACTCGTTACATTATCCTTAACTACTTTTCTATCTAACAACGCCCAT  
AAATTTTCAATTGGATTAAATCAGGGCTTTGAGAAGGCCATTCTAACATCTT  
TACCGAGCGAGAACGTAAAAAAGCGGTGGTTTTTTTTGGCAGTGTGCTTCGGA  
TCATTGTCCTGCTGCAAATGAAATGTCTGCGTAATCCGGCCCTTCTAGCTGA  
GTTAGTCAGGTTGCCTTTCAAATATCAATATAGACATCGGACGTCATAATACC  
GTGTATATGGACTAAATTACCCACACCAGCCCACGAAAAACTGCCCCACCCC  
ATAACTACCGCCGCGTGCTTTACTGTGGCCTGCAAATGCCGCTCTTTCAA  
AGCCTCATTTGTTTTCAACCAAACCTTTTCGCGCCGTTTGCTATTAAATATCTC  
GAATTTAGATTCGTCGGACCACAAAACACTTCTTCAAATTCCTTTGTCTTAC  
TAACATATTTTCGGGCGAATTCCAATCGCTTGAGCTTATTTTTTTTACTAATGA  
AAGGACGTCTTTTAGCTAATCTACTTTCGTATCCGTGTTGAACTAACCTACGT  
CGTATAGTACGGTCCGAAATGGACAAGGAGAGAGATTCTTTGATCGAACGGA  
TCGTTGTTTTAGGGCTCTTCTTTATCTCACGAATGATTCTTACGTCCATCCGAT  
GGTCCGTCTTCTAGGGCGTCCTGTTTTTCGATCGGTCGTTAACCGATCCAAAA  
ATTCGGTGTTTTGCTATAATAGCCCTAACTGCTCCCCTACTTATAGAAAATTTT  
TCTGCAATCTTTCGTTGAGAAACGTTATTAATAATTATCTTTTAGAACAAGATTT  
CTCACTTGCAAAGAAATTTTTTTCCCTCCCATGCTATTTTTAATTGCAAATCT

ACTGCGCAATCAACTCTGTGCTAGCTATACTACGGCTGGTAGACTAAATCAAA  
 GTAATCAAATATCAAGGTCATCTAAAACGTCAAACCTAGATGTAAACGAGGGG  
 CCTATCAAAGATATACTATCACAAAGGGGCTTATCAGAGGCACAATATTGTTTTT  
 TGCAAAGTGGGCTTTTACTTTTGTGATAATCATGCTCGACCATCTCTCACTCA  
 AAGAATTTTCAAAAAAAGTTATCGATCCAATCGAGACGAATGCTAGTGAAA  
 CTGAAAGAGGAATGTTCAAGCTTTAAGAAAACCACTGCACTTGCCGGTTACG  
 ATAGAAAAGGTAGGATTTATAGTCAAAAATCTACAAAATCAAGGGGTGGGC  
 TTTTACTTATGCCGGTCACTG

### 9 – Mariner9-Andl

#### MITE

#### Short description

A total of 10 copies of this element were found in *An. darling* genome, the larger showing 738 bp. The TIRs have 223 pb and TSD consisting TA. The ORF finder found 9 ORFs, indicating this element is not able to produce active enzymes. These characteristics suggest that such sequences are MITEs.

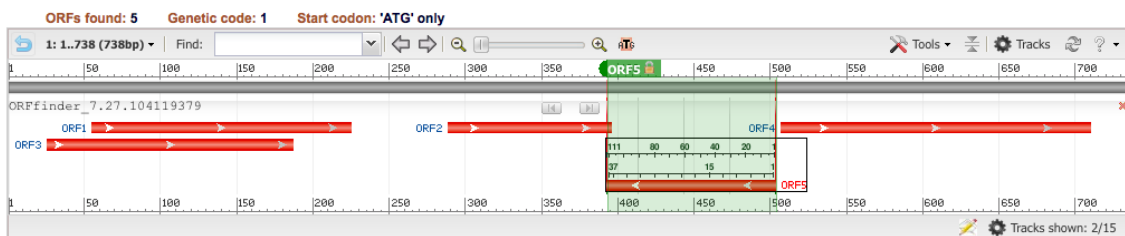

**Figure 9** - Orf Finder scheme of ORFs detected in the Mariner9\_Andl element

#### ORF 5

(Blast -transposase -Ceratitis rosa)

>|cl|ORF5

MIKIFLCPEIDGMNLDDEMLFHQNGATCHTSDETIFI

> Mariner9\_Andl (sequence) Red = TIRs

AAGGGTGGTCCAACCTTAGGTGCACGATGTTGATTGGTTATAAAACACACAGT  
TTATGGAAAATACCGTTATTTGTATTTTTTTTGTAGATCAATGCTTGACAATTA  
TGTGTGGAACAATATATCGCCCATATGTTCAACCACGGCTTTTGTGGCAAACCG  
CTATTCGTTGGTCCATATTTGCGATAGCTCGGCTACATAAAATTGGATCTATGT  
CCCTGGTTTGACGAATAATCTCGTTTTTAAGCTCTTGTATGGTGCCTGGTTTAT  
AAACATACACTTTTTCTTTAATGTATCCCCAAAGAAAAAAATCCTGGGGAGTT  
AAATCACAAGATCGGGGCGGTCAATTCACGTCGCCACAACGAGAAATTATCC  
GGTCTTTGATTTTGACGCTTTAAATGAAAATGGTTTCATCGCTTGTGTGGCAG  
GTGGCGCCATTTTGGTGAAACAACATTCGTCTAGGTTTCATACCATCGATTTC  
AGGGCACAAGAAGATTTTTATCATCTCATGATAGCGAACACCATTACAGTAA  
CCGCTTGGAACCGTATCTTCGAAGAAGTACGGCCGACTTTAACGCGGTGT  
TTCATCACTTTAACGCGCTGTTACAACGAATATCGCTGCATGATTGAAATTGTC  
AAACATCCGACTAGTAAAATATCAAAACAATCGTGTCTAAATCGAACGATTA  
TCGAATGGTAGACATTTAACATCGTGCACTCAAGTTGGACCACCCTT

### *10 – Mariner10-Andl*

#### **MITE**

##### **Short description**

A total of 2 copies of this element were found in *An. darling* genome, the larger showing 489 bp. The TIRs have 22 pb and TSD consisting TA. The ORF finder found only 1 ORFs. However, this ORF is very short (22 aa) indicating this element is not able to produce active enzymes. These characteristics suggest that such sequences are MITEs.

ORF 1 -no significant hit

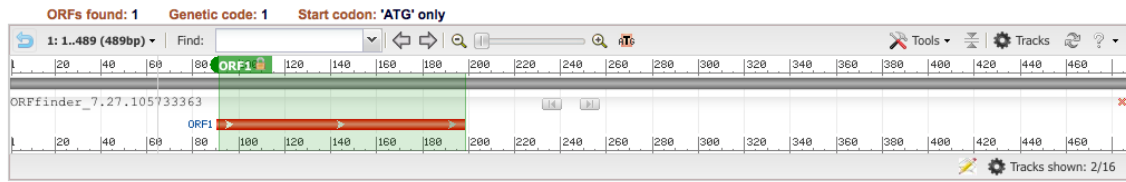

**Figure 10** - Orf Finder scheme of ORFs detected in the Mariner10\_Andl element

> Mariner10\_Andl (sequence) **Red = TIRs**

**TATCGTAAAAAACCAAATTAAGTCCGATTTTGCCTCAGCGGTATATGGTGG**  
 GTGCATAAAAAGTTCATAACCAAGCTCTCTAAATTGAATGCGATGCAAAGTTG  
 AATGCGTCCTGCTTTGCTCTGGAGGACTATATTTTTATGATTTCTGTCAGCTTC  
 TCGTTAAGGGTCCATCTAATTTGATCAATTTTTGGTAGTAGACATTCAAATCAA  
 TCATTTGATTCCTTGGAAGCGTCTCAAAGTTACTATACTCTTCCAACTCCAC  
 CAAACTGACAACAATAATCTTGTTTTGGTGAATACAAATTTTTGAAGTCCTGT  
 TGAAGTGGTCCTCAAATTTAATCCGTGATCATTTTTGACTTTAGTTACTGTA  
 CAATTGAATGTTGGTTAATAATGTTGTTTTGTCCGAAAATGAATCAAATTCATT  
 ACGTTAAGCAAGAAATACATAAGGGTTGAAAAAGGTTTG**TAAATTGAATTT**  
**ATTCCGATA**

### ***11 – Mariner11-Andl***

***Potentially active element (at least recently)***

#### ***Short description***

A total of 12 copies of this element were found in *An. darling* genome, the larger showing 1285 bp. The element has TIR 230pb long and TSD consisting TA nucleotides. The ORF finder found 12 ORFs. However, two larger ORFs (ORF 3 and 1) codify a transposase with 301 aa, compatible with an active transposase. The assembled copies showed a frameshift, but it is possible there are functional copies in the populations.

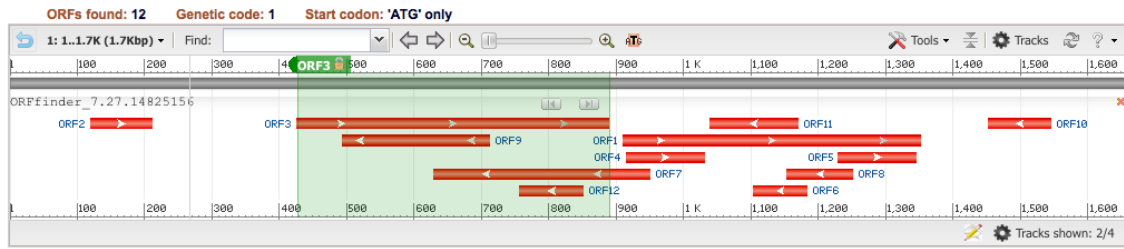

**Figure 11** - Orf Finder scheme of ORFs detected in the Mariner11\_Andl element

ORF 3

( Blast - transposable element tcb1 transposase - Lasius niger)

>|cl|ORF3

MFREVQDIMCCYAKKIANALKWNYTPESRGKKRATSAQTDREIIRTVKKR  
 PQISSLALKKELNLSISTSTIRKRLREANLYARVPRKIPLKPRHIQNR  
 MFAKSRVNWPLTKWRNLTDESKVELFGSGGQRKFVRCPPPFWNEPQIY  
 CKHS

ORF 1

(Blast - transposable element Tcb1 transposase isoform X2 [Drosophila bipectinata])

>|cl|ORF1

MVWGCFSYSYSGVGIPIHRIEGIMNAVGYVDILQNIMLPYAENELPLKWVFQQ  
 DNDPKHTSKRAKAWFQERKIDVMEWPAQSPDLNPIEHLWTDIKRAVNKAM  
 PKDSEQLWAAVKAAWYQIPTSRCQNLMDMPRRCAAVIKHKGHATKY

> Mariner11\_Andl (sequence) Red = TIRs

CAGCATTGGTCGATAAAATAGCAGCGCAAGTGCGATACGAAACTTGCGCGT  
 TGTACTCGCTCACGCTTTCTTCTAATTAATTTTTATCGCATCTGTTGGGTGCATT  
 AGCGTCTGTGGAATGCGGTTTGGTGTAAATTTAATTATCGATCGCTTAGGTAT  
 CAATATATAGGTATCTATTGCCAAAACCGTCTGGTTCAGGTTGGTCGATGAAAT  
 AGCAGCGCTAACGAAGAAGTCTTTTTTTAGTGACGCGAGTTTTTTTTGTGAA  
 ATCGCAGTTGTACTACTGGGTAATGTGAAGAATTTGCGGGTTTTTACACTAGG  
 TTTGAAACATCTAACGTAAGTTCAATTTTCAGTAAAATGGGGCGTTCAAAGC  
 ATTGAACGGTTGAAGACCGAAATGCGATAAACGATTGATATCGGGAGGAAA  
 GATGTTTCGGGAAGTGCAGGATATAATGTGCTGCTATGCGAAGAAAATAGCA



AATGCACTGAAATGGAATTACACACCCGAAAGTCGTGGAAAAAAGCGCGCA  
ACAAGCGCACAAACTGATCGCGAGATAATCCGAACGGTGAAGAAAAGGCCA  
CAAATTAGTTCTTTGGCATTGAAAAAGAATAAACTTGTCTATCAGCACATC  
AACGATAAGGAAACGTTTGCGGGAAGCAAATTTGTACGCCAGAGTGCCGAG  
GAAAATACCCTTGCTTAAACCAAGACACATTCAAAATCGAATAATGTTTGCCA  
AGTCCCGGGTCAATTGGCCACTTACCAAATGGAGGAATATTCTTTGGACTGAT  
GAGAGCAAAGTGGAGTTGTTTGGATCTGGGGGACAGCGAAAGTTTGTGAGA  
TGTCCCCCCCCATTCTGGAACGAACCCCAAATTTACTGTAAACACAGTTAAAT  
TTGGAGGAGCCAAGGTTATGGTATGGGGCTGTTTCTCATAACAGCGGTGTAGG  
TCCCATTACCGTATCGAAGGCATCATGAATGCTGTTGGATATGTCGATATCTT  
ACAAAATATCATGCTACCATATGCGGAAAATGAATTGCCGCTAAAATGGGTCT  
TCCAACAAGACAATGACCCCAAGCACACCAGCAAACGTGCAAAGCTTGGT  
TTCAAGAAAGAAAAATTGACGTAATGGAATGGCCCGCACAAATCCCCCGATCT  
CAATCCGATCGAACATTTATGGACGGACATAAAAAGGGCTGTGAATAAAGCA  
ATGCCAAAAGATTCTGAGCAGTTATGGGCCGCAGTAAAGGCAGCATGGTACC  
AAATACCAACAAGCCGCTGCCAAACTTAATGGATTCGATGCCACGAAGATG  
TGCAGCCGTTATAAAACACAAAGGTCATGCTACTAAATACTGAGCACTTGTC  
ATGTTTTCTAATTGAAATCTAATAAAATTCGAATACAAATTTGGCTTTTTTGT  
AATAAGAAGCTCGTTGAGTTTGTAGCGCTGCTATTTTCATCGACCAACCTGAAC  
CAGACGGTTTGGGCAATAGATACCTATATATTGATACCTAAGCGATCGATAATT  
AAAATTAACACCAACCGCATTCCACAGACGCTAATGCACCCAACAGATGCG  
ATAAAAATTAATTAGAAGTAATCTTGAGCGAGTACAACGCGCAAGTTTGCCTA  
TCGCACTTGCGCTGCTATTTTATCGACCAGTGCTG

## *12 – Mariner12-Andl*

### **Degenerated element**

#### *Short description*

A total of 46 copies of this element were found in *An. darling* genome, the larger showing

1285 bp. TIRs are 30bp long and TSD consisting TA nucleotides. The ORF finder found 9 short ORFs, indicating this element is not able to produce active enzymes

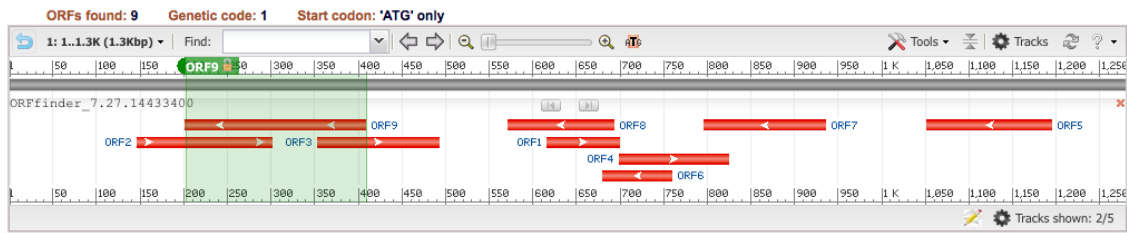

**Figure 12** - Orf Finder scheme of ORFs detected in the Mariner12\_Andl element

> Mariner12\_Andl (sequence) Red = TIRs

TACAGGGTGGCAACGTGAAAGTGACACACTTATTCCAGGGCCCCCTGTACTA  
 ATTCGAACAGCTATAATTCAGATCTTGGTTTACAGTTTGAAATAGCAGTATTTT  
 TACGGCTGGGTTTGAGTGTATGGTCACCCAAAATTGTAATGGATTCTTGTAG  
 CGAACAAATCAGATTGTTGTATCTTCAAATCCTCATCAACATTCAAATAAGAG  
 GAAGGCTGTCACATCTGAATTTGAGCAGATTATGCGCGTACAGAACCATCAA  
 ACGATTCAAATATAGTGATATGGTTGTCCCCAAATAGAAACCGGTAAAAAAC  
 GGACTGTACGAACTCTAACGACTATTAATGCGGTGATGGAGCGCATAACGACG  
 AAATCCGGAACGATCGGAAAGAAAATGGCTAATGGCATGAAAATGAGTCA  
 CACCTGCATGCAAAACATAATAAAAAATACCTTAGATATAGTCCTTTCAAGAA  
 GCAGAGGATTCATGGGTTGACTCGCAAAAACCTCGCCGACAAGTTTGCTAGA  
 TCTCGGATGCTGCTGAAGACGCACGCTGCTCACAACATATTTTTTTTCAGACAA  
 CAACAAAAGACTTTGGAGGCAACTTTGAACAAGCAAATGATTGCGTGCATA  
 GTGTATCTTTTCGCGGTATTCCAACCGATAAAAATGGTGCGGAGCGATATCAA  
 AATGGCTCATATGTGATGGTACGGGGCGCCATATTAAGAAATAAACTCCC  
 ACTGTTATTTGTTGATAAAGGCATAAAAATCCACAAAAAATATTATTTGGAGTT  
 CGTTATCAAGCTCCATTTGATTCTTGTGCGTAGAAAATATAAGGAAAAATAG  
 ATTTTTGTTTCCAACAGGCTTCAACACCTGCGTATAAGGCATTGACTGTTTCAG  
 ACATGGTGAGCGCAAAATTTCCCATGCTTTGAAAGCTCATCGGAATGGCATG  
 TATCTTCTTCAGATTTAAACGCACTCGATTTCTAAGCGTGGGGATACTTGCTAG  
 GGAAGCTGGTTGACACAAAGAATATGACTTTAATACGTAAAAAACGGTTTAT  
 AAAAATTTGAGACAAAATACCGAAGAGAGACGTCCGTGCGGCTGGCAAAAG  
 TTTTGAAAGCGATTAGGGGCTGTAATAAAAAACAAATGCGAAAGAATGGAA

ATGAATCAATCAAATTGAAACAATAGCGATAGGACATTGTGTAAAAATGAGA  
 AATACGTGAAAAATCACATAGTTTCCATTTTATGACAAAATTTA**AGTGTAGCA**  
**CTTGACGTTGCCACCCTGTA**

### 13 – Mariner13-Andl

#### Degenerated element

#### Short description

A total of 64 copies of this element were found in *An. darling* genome, the larger showing 906 bp. TIRs are 64bp long and TSD consisting TA nucleotides. The ORF finder found 5 short ORFs, indicating this element is not able to produce active enzymes

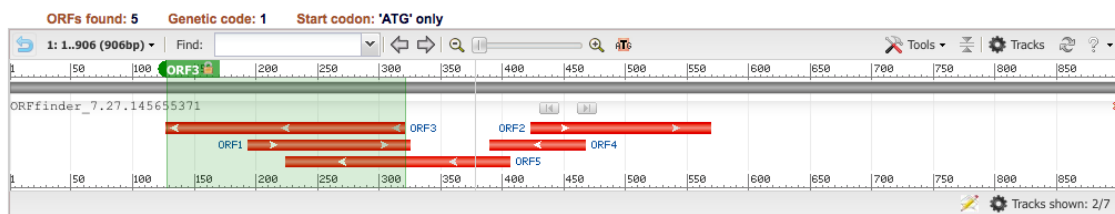

**Figure 13** - Orf Finder scheme of ORFs detected in the Mariner13\_Andl element

ORF1

(Blast - putative DD34D transposase - *Bactrocera tryoni*)

>|cl|ORF1

MGDDVKQRICKLFCFANEMSCADALKMLQKAFGNNTPIENSCI

> Mariner13\_Andl (sequence) Red = TIRs

**CATTCTGTCAAGAAGTACCGGAATAGTCGATTTAAATCTGACTGGGCTGTCCG**  
**ATCAATTGAAG**TCTTTTTTTCCTAGGTTGGTACAACCTGTCCTTAAATATTGTGC  
 AAAATTTGAGCAAATCCGTCAACTCGTTTGTTCACAGCCATTTTTTAAGTAA  
 GTCGATGTCAGTAGTGAGCGGCGATTTGTTATCATGGGTGACGACGTAAAC  
 AAAGAATTTGCTTAAAGTTTTGTTTTGCAAATGAAATGTCGTGTGCCGATGCA  
 TTGAAAATGTTGCAAAGGCCTTTGGCAATAATACTCCAATCGAAAACCTCGT  
 GCATATGAGTGGTACAAAGCCTTCAAAGTGTTTGGACAGATGCCTTGATTTC  
 TGATTGTTCACTTCCCTCAACCGATGAAAACATCGATAAAGTGAAAGATA

TGGTGTTTCGAAAAACATCATTATAGCTTCAGAGAGTTGTTTCATGAACTTAAC  
 ATATCGGTTTCGTAACATTTTGGATTGATTTTTTTGGACATGAAACGTGTTGCAGC  
 AGAACTCGATCCAAAAGAAGTTTTTTTTTACATTTTTTTAATTTTCTATTTTTTCG  
 CTCTAAAACTAAAAAATATCATCGAACAAACCACCGTATTAACCAGAATTAGT  
 TCCCTGTGACTTTTTACTTTCCCAAAACTTAACTTGCCCCTTCACGGCATCT  
 GTTTTGAGTCGATTAAAGCCATAAAGCAAAAATCGCTGCTTACTACTGACATC  
 GACTTACTTAAAAAATTGCTGTAAACAAACGGGTTGGCGGATTCCGCTCAA  
 TTTTGCACAATAGTTAAGGGCAATTGTATCAACCTAGGAAAAAAAGCT**TAACT**  
**TGATCCGACAGCCCAGTCAGATTCAAATCGACTATTCCCGGTACTTTCTTGAC**  
**AGAATG**

**14 – Mariner14-Andl**  
**Degenerated element**

**Short description**

A total of 16 copies of this element were found in *An. darling* genome, the larger showing 1321 bp. TIRs are 33bp long and TSD consisting TA nucleotides. The ORF finder found 17 short ORFs, indicating this element is not able to produce active enzymes

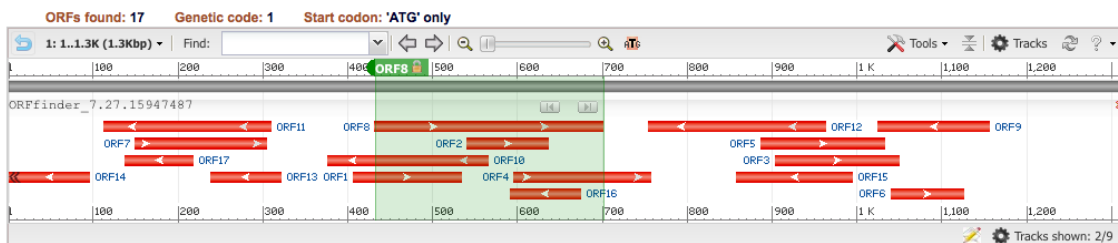

**Figure 14 - Orf Finder scheme of ORFs detected in the Mariner14\_ Andl element**

ORF12

(Blast - putative DD37D maT transposase -*Bactrocera tryoni*)

>|cl|ORF12

MVQKLLKKRIQRNPRRSGNQHARDLSISRRSVRRILTHELGLKALKIQKVQ  
 EVTDAQKKLDSKDRKTCFV

ORF 11

( Blast - putative DD37D maT transposase -*Bactrocera tryoni*)

>|cl|ORF11

MDYCVWVGILEAKVSNKKYSSIDQLKQALRREWAKIPQEQLRTACEGFVGR  
LKAIVRAKGGYFEQT

> Mariner14\_ Andl (sequence) Red = TIRs

ATACAGGGTGC GGCAAAAAAAAAACTGCAACAAA GTAAATCATCATAGTTTTT  
TCAATTTTTATTGAATTTAATTCAAAAATTGTTAGAAATTTTCATAACATTTTTAA  
AACAGTTACGTTTGTTCAAAATAGCCACCTTTAGCACGAACAATGGCCTTTAA  
ACGCCCGACAAATCCTTCGCACGCTGTCCGCAGCTGTTCTTGGGGAATTTTG  
GCCATTCTCTGCGAAGGGCTTGCTTCAGCTGGTCGATAGA ACTATATTTTTT  
GTTGGAAACCTTGGCTTCCAAGATACCCAGACACAATAATCCATCGGATTAG  
CATCAGGGGATCTTTGGGGCCATATTGTGTCGCAGTAATGAAATTCGGAACCT  
CTGCTCTAAGCCATTCTTGAGTGGCGCGCGCCGAATGAGACGGT GCCGAGTC  
TTGTTGAAATGTCCAGCGTCGGTGTCCGAAATGTTTGTGTGCCACGGCTTC  
AACACACCCTCCAGGATGTTTTCCCGAAAATATTCGGCATT TATCTTTATGTAG  
CATAAAGATAAATGAAAACGAGCGGAGAGCGAACATCAGCAGTTATCCGCGG  
CCCACACCATCACCATGGCCGGCGCTTGTTCTCTGGTGGCCAACCGAAGATG  
TAAATTATCAGTTGACCTCTTTGGTAAGTCAACACGATCATTTTGTTTGTTTAC  
AAACTGCTGGATAAGGAACGGTTTCTCATCGGAGAAAACCAAATTCGGAATT  
TCCCCACGCGCGGCCTAGACGAAGCAAGTCTTTCGATCTTTCGAGTCTAACT  
TTTTTTGGGCATCTGTTACCTCTTGACCTTTTGAATTTTTAAGGCCTTCAGTC  
CAAGTTCATGTGTCAAATTCGTTCGGACGGAACGCCGCGATATGGATAGGTC  
ACGGGCATGCTGGTTGCCGCTGCGCCGTGGATTTTCGTTGGATCCGTTTCTTGA  
GTTTTTGGACCATTGCTGGTGCAGTTGCAGTTTTTTTTGCGGCCATTTCTGGA  
CGCCGGGCTACACTACCAGTCTCACGGTAGCGAGCGATGGTGC GTGACACAA  
ACGATTTGTTACATTCAAATGTTTTGAGGGCGCTGACGATATCAACTTGTGC  
TTTTCCACCCAAGTGTAGTGAATCACACTTTCACGCTTCAGCTCCATGGCGA  
TTTTTAGAATTACCGAAAGTGATGCAACAAAATAAATTCGTACGATGGTTTAC  
TACTAAATGAACTGTC ACTGGAATAATTTTGACAGCTGTCAGTCGAGCAGATT  
TGGAATGGCAGCTATTTGAAGTTGGTTGCAGTTTTTTTTGCCCTACCCTGTATC

A

**15 – Mariner15-Andl**

**Degenerated element**

**Short description**

A total of 31 copies of this element were found in *An. darling* genome, the larger copies have an estimated size of 1220 bp. TIRs are 23bp long and TSD consisting TA nucleotides. The ORF finder found 9 short ORFs. However, there are long nondeterminate sequences (NNNN) which difficulties a more accurate analysis.

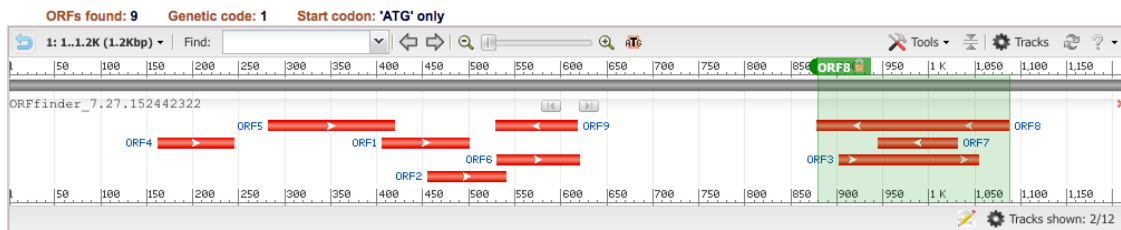

**Figure 15 - Orf Finder scheme of ORFs detected in the Mariner15\_Andl element**

> Mariner15\_Andl (sequence) **Red = TIRs**

**CAGGGTTACTGAGATGAAGTGTT**ACCAACTTTACACTGCTTGTATCTTTTGAA  
 CCACTCATAACTTCAACGCCAAAATTGTTCTATTGAAAGTTCAATATATTGTCT  
 ACAAGCCACTAATAGCGTTTTAATCTCAGTTTTACTGAATATTTTTTTACCGTC  
 ATGGAATTA AAAATTAAATTTGCATTTGTATATTTGGCAAATCATAACCAGCTA  
 CTGTTTCGTGAGCTCAATCACCTTAAAGTGAATGAAATATTTGTGTATCACACC  
 ATAAATTGTTACAATGATACTGGTAGCATTGCAAAACGCTTTGGAGGTGGACC  
 AAAAAAACCGTAACGTCGAAAATGTTTTTGGTAAAGTTATGACGGAAGTTGA  
 AAGAATTTACGTCACCTGTGCCACTCAAAGGATGGAGAGAAGTGAATTTG  
 AGCTTGAATCATTAAAGGATTAAGGAGTTGATGCGCTTGCACGAATGTGGCG  
 AATTTCCAAACATTGTGTTCTCTGATGAGAAAAATTTAGCCCAATTGGCAATT  
 CATGA ACTCTGAAAACGGTCAAATTTACTTGACCGAACGCTCAGACGAGAAT  
 TTGAGCCTACATACGGCCACTCGTAGCAATTCCCATAGAAAAAATAGCTTGG  
 GCCGCAGGGATCGCTGATGGGCGCTCTGCAATAGTTTACATCGAGCCTGGTG  
 TNNNNNNNNNNNNNNNNNNNNNNNNNNNNNNNNNNNNNNNNNNNNNNNNNNNNNN  
 NNNNNNNNNNNNNNNNNNNNNNNNNNNNNNNNNNNNNNNNNNNNNNNNNNNNGTGGACACGT

AAACATTCCGGTCGTCGACCATGGACGTTCCAACAAGACTCAGCACCGTCTC  
 CTAAAGCTCATGTGAACCAAGAATAGTTAAAAAATCATGTTTCACATTCCACA  
 GACGCAAATGCGATGGACTATTCCATCTGGTCCATATTGTACAGCAAAGTGAG  
 GACTATAAATTATGCCAGTATGGATGCGCTGAAGAAATCGATTGTACGAGAAT  
 GGGCCAAAACACCACAAGATCACATTTGTGCAGCATGCAACTCGTGTATGGA  
 CCTTTAGCAGGCTATAGTTAATAGGCAAAGGTGGCCACATCGGGCTAAAGTG  
 AACGGATTCTGAAATTTTGATTATCCTCAAACAATTTTGTCTTTGAAATCACTA  
 AAAAATGATAACACACAAACAAGATATGGTGTTTTGAAAAGGTA**AAGGCTTC**  
**ATATCAGTAACCCTG**

### 16 – Mariner16-Andl

#### Degenerated element

#### Short description

A total of 3 copies of this element were found in *An. darling* genome, the larger copies have an estimated size of 1471 bp. TIRs are 25bp long and TSD consisting TA nucleotides. The ORF finder found 6 short ORFs. However, there are long nondeterminate sequences (NNNN) which difficulties a more accurate analysis.

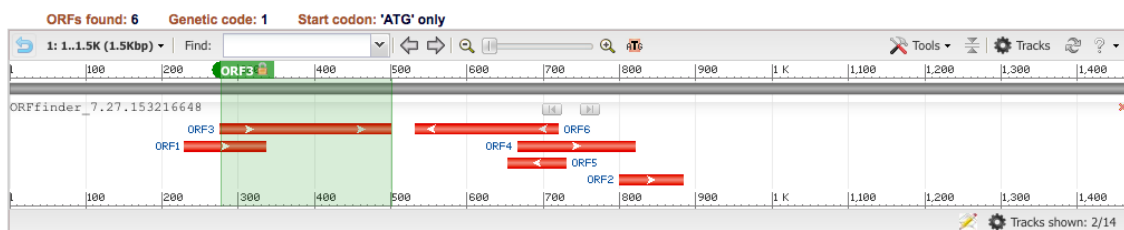

**Figure 16** - Orf Finder scheme of ORFs detected in the Mariner16\_Andl element

> Mariner16\_Andl (sequence) **Red = TIRs**

**CAGTTGTGTTCAATAAATTAGCAGT**GGGGTGGTTCAAAAAGTTAAAAGTAATTT  
 AAAATGCTATTTCATAACATTCGAATTCGAAATCTGTTCTGTGTGTATATAAAAA  
 GGAACAAATAGTAAACAAGAACATATGGTTTGCTTTTGAAAATCAACTCATT  
 TTAAGTACAAATTTAAAATAAATAAAAATTATCTGTTACAAATTCACAAAAA  
 TAGTAGTATTTCAACAATGCCGGTATTATCACCCGAGAATATTAATTTGAAAA

GAAAAAAGATGCATTGTACTGGGATTGCTTTGTCCACTTCAATATTTTGCGGT  
ATAGCCTTTATTCTTAATAACAGAGGGCGCATCGCTTAGGCATAGAGCTCACAA  
CTCAATGACATCGAGCGATAGGGATTGCAGCCCCAGTCTTCAAACATTGCA  
CCATTTTTCCTTGGGCCAGTCGACATGCTTTTTTGCAAACCTTAAGACGGTTTG  
TTACATGTGGCTTCGTCAATAATGGTACCTTGCGGGGTCTAAGTGCGTACAGA  
TTAGCTTCCCTTAATCGGCGTCTGACTGTTACTGCACTCACAGACAACCTCAA  
TACATCCTGCAATTCTATTGGAAGTCATTGCTCGTGGATCTCTACGCGATAAGT  
TGGCTATCTTTCGGTCAGTTTTCTGGGATGTGCATCGTTTCCGGCCACAAAGT  
TCTGCCTTTGCTTTCATTTTAAGGTCATTACTAATCATTTCGAATCAGGTTGT  
ACGATTTACCTTCCTTTTTTCATTTTCTTATTAATTCCGCAACTCTAGAGAACA  
ATGTTTACCGCGCCTGCTATAAAAACAAAACCGACTTGTCTTTTCATGAATAT  
TTTTGATTTATATATTCTTACCGATAGATGAACAATCAAACCTTGCCAATTTTTT  
TTCAAATATCCGCAAAAAACAATGAAATAGTATGGAATTGTTCTTCACTGCT  
ACTATTGTGAACAGCGCAAAACAGACGNNNNNNNNNNNNNNNNNNNNNNNNNN  
NNNNNNNNNNNNNNNNNNNNNNNNNNNNNNNNNNNNNNNNNNNNNNNNNNNN  
NNNNNNNNNNNNNNNNNNNNNNNNNNNNNNNNNNNNNNNNNNNNNNNNNNNN  
NNNNNNNNNNNNNNNNNNNNNNNNNNNNNNNNNNNNNNNNNNNNNNNNNNNN  
NNNNNNNNNNNNNNNNNNNNNNNNNNNNNNNNNNNNNNNNNNNNNNNNNNNN  
NNNNNNNNNNNNNNNNNNNNNNNNNNNNNNNNNNNNNNNNNNNNNNNNNNNN  
NNNNNNNNNNNNNNNNNNNNNNNNNNNNNNNNNNNNNNNNNNNNNNNNNNNN  
NNNNNNNNNNNNNNNNNNNNNNNNNNNNNNNNNNNNNNNNNNNNNNNNNNNN  
NNNNNNNNNNNNNNNNNNNNNNNNNNNNNNNNNNNNNNNNNNNNNNNNNNNN  
NGGAGATCCCTTTACTACACACCAAATGATCGATTGATAAAATAGACAACGC  
ATGCTTGAATAATGAGCATTACAGTTACAGCGTGGTGCCTACTGCTATTTTATT  
GAACACAACCTG

\

**17 – Mariner17-Andl**  
**Degenerated element**

**Short description**

A total of 3 copies of this element were found in *An. darling* genome, the larger showing 886 bp. TIR are 29 pb long and TSD consisting TA nucleotides. The ORF finder found 8 short ORFs, indicating this element is not able to produce active enzymes.



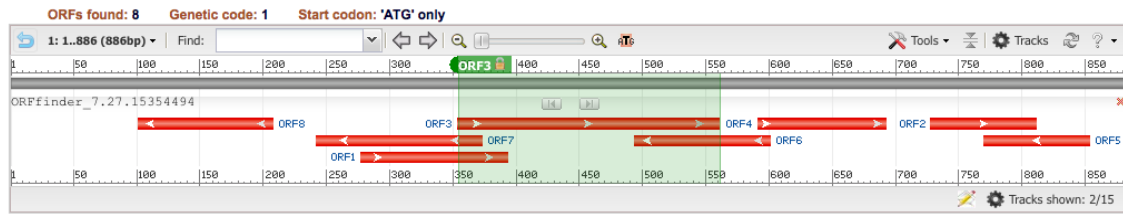

**Figure 17** - Orf Finder scheme of ORFs detected in the Mariner17\_Andl element

> Mariner17\_Andl (sequence) **Red = TIRs**

**TTAGAGGTATGCGTTGAAATCCGCGGTTT**TTTTTAAATTC AATCATTATATTTT  
 AAAACTCCTTTGCAACTGGTCATTGAAAGTATTGTCCATCCTTTTTCACTGCT  
 TTCTGCCATTTATCAGGCAATTTTCGGATCCCGAAGATCGAAAAAATCAGCC  
 TCTATGGTGGCAGTGTAGTCAACTACCCATTTTTTGTTTACTTCCATAAAGAGT  
 GACCTGCCGTGCTGCCAAAAATGCTTCAAGCAACCAAACAAGTATTATTGA  
 GAAAGAGCAATGTCTGGTGTATACAGTCGTGTGGGTAACATTTTCGGCTGCGA  
 CGTTTTCTGAAAAGTTTTTGACCGGTTTTGCAACATGCGGCCGAGCGTTATCA  
 TTAAGAAAAATTCGTTTATAATGTCGGATATCCCATTTGCCATTTTCTAGCCAGA  
 GCTCGCACCAAATGGACCAGTTTCCGGAGGTTTTTAATGCACGACACTCTTT  
 AAATCTTATTTTTTTTCATTTTTTTGGTTGGCCCGAACGTTCTGTTTGTGTAAC  
 GCCGAAATTTCCGCTACTAATTCTTTGAAAATAGCTTTCACATTTTTGGTGTGCG  
 TAACATGTAAACCATAAACTTAAACCAACAATCGATGAAGCTCAGCAGCCGT  
 TTTCGTCAAATGAAAAAAGGGGCTTAAACTTTCCCGCAA AATTGACTTTTT  
 AAGCATCAA ACTCGACAGTTTTAACTTGAGAAAAAATATGTTACAGTCAATAT  
 TTTGCACAGTTTGCACATATTTTGTTTTAAAGGCATTTAGTTATACTTTTAAAC  
 GATATAGCATATAAGGCTGTGAACCTTCCGCAAAAAAATAAAATGGCGTCTTC  
 CATTAGC**AAACCGCGGATTTCAACGCATACACCTAA**

### **18 – Mariner18-Andl**

#### **Degenerated element**

##### **Short description**

A total of 42 copies of this element were found in *An. darling* genome, the larger showing 1268 bp. TIR are 215/225 pb long and TSD consisting TA nucleotides. The ORF finder found 5 short ORFs, indicating this element is not able to produce active enzymes.

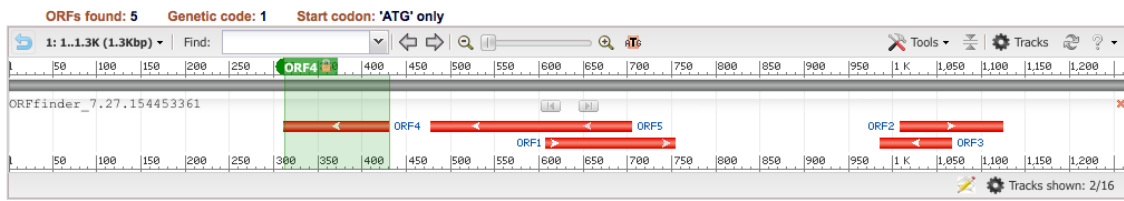

**Figure 18** - Orf Finder scheme of ORFs detected in the Mariner18\_Andl element

ORF 5

(Blast -Transposable element Tcb2 transposase-like Protein -Tribolium castaneum)

>|cl|ORF5

MDRIIKWYSTKDAFASGMEIKSKSSLDISSQTIQRRLGDGGLFSCKPAKK  
 PYINNEGITSFCDELFDLGCLNIKK

ORF 4

(Blast -Transposable element Tcb2 transposase-like Protein -Tribolium castaneum)

>|cl|ORF4

MKQARRPLYTRLNPQYCKKAIKYGRRCCWSEIPKERSTN

> Mariner18\_Andl (sequence) **Red = TIRs**

**TACAGTGTTCGGACATAAGTTAAGCAACTGGGTAAAGGTGTATGAAAAAGTGT  
 TTTAAATTTTAGTTTTCAACCAACAACCAACCAAAAACCAAAAAGGGTACCT  
 ATTTACGATATTTAAGACGATTTAAGTTATTAATTTTTCTTCGAATAGCACATT  
 AACAAAAAGTTTCTTAAAAGGATTGAATGTTGATACGACATAAGTTAAGCA  
 ACTGAAAGATATCAATTCGTATTTGCTGATTGTTTCAGTATTTTCGTTGCGAATC  
 AGTTATTTTTAATTAGAGCTACACTTCTTTTGGGCATAAATTCAGTCAATTTGT  
 TGATCGTTCCTTCGGAATTTCACTCCAACAACATCTTCTCCCATATTTAATAGC  
 CTTTTTGCAATATTGCGGATTTAATCTAGTATAAAGTGGACGTCTAGCTTGCTT  
 CATATCATCCGAATTAACAGATCGAATATGGATTCATCACTAAAGAGCACTAT  
 TTTTAATATTGAGACATCCCAGATCAAACAACCTCATCGCAAATGAAGTTAT  
 ACCTTCGTTGTTGATGTACGGCTTTTTTCGCTGGTTTGCAACTGAATAACCCAC  
 CGTCTCCAATCGGCGCTGAATGGTCTGGGAACTGATATCCAAGCTTGATTTA  
 CTTTTTATTTCCATTCTGATGCAAACGCATCTTTGGTTGAATACCATTTGATA  
 ATGCGGTCCATTTGGATGAAGTTTTTCAAAGACGCCTTTTGCCTTATACGGG**

TTATTAATGAGAACTACTGATTTATCTATGCCATAAGCTTCACTAGTGTATTT  
 CTAAGAGCTTCCCAGAATCGCTAGTTTCATTTCTATTTTGTTCATTCGCTAG  
 AATAGATATTACGCGACACTGTTACGTTTTGAATGTAACCGAGTGTGTTGGGC  
 GTTCAAAGGCCAAAAGAATACTAAAACATCATAAACCTTGACAGATTTAGCA  
 AGTTTACACACCAATAGGCTACTACTATGCAGAAATTCCGCATGTGATGATCA  
 ATATTTTCTTATTTTGTCTCCAAAATAGCCAGTTGCTTA**ACTTATGTCGCATTAA**  
**AAATCTATGCCTTTTTGAAACTATCGTGTTAATGCGCTATTTTAAGAAAAATTA**  
**ATAACTGAAATCGTCCTAAAATATCGTAAATAGGTACTCTTTTCAGTAGCTGA**  
**GTTGGAAATTGTACAGTTTGGTTGAAAATAAAATTTTAAACACCTTTTCATA**  
**CACCTTGACTCAGTTGCTTAACTTATGTCCGACACTGTA**

### 19 – Mariner19-Andl

#### MITE

#### Short description

A total of 9 copies of this element were found in *An. darling* genome, the larger showing 792 bp. TIR are 17 pb long and TSD consisting TA nucleotides. The ORF finder found 5 short ORFs, indicating this element is not able to produce active enzymes. The short length, conserved TIR and TSD suggest this element can be a MITE.

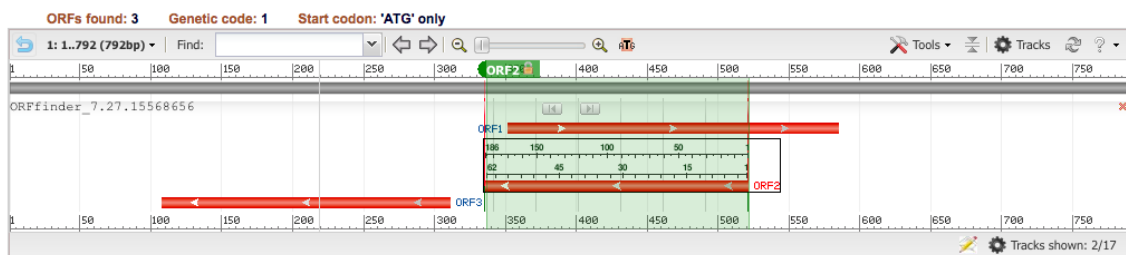

**Figure 19** - Orf Finder scheme of ORFs detected in the Mariner19\_Andl element

#### ORF 3

(Blats - Mariner Mos1 transposase - Acromyrmex echinator)

>|cl|ORF3

MKYYPTRCIHQTMFYLNACLVTYIFFAYRTSLIYARIEKWLLDKITLKN  
 EYFFRHRIRKLTERWKK

> Mariner19\_Andl (sequence) Red = TIRs

**TTAGGTCTCTGAATTAG**ATTTTTCGAGTTTTTGGCTCAACAAAACCCATCTATA  
CTCAAAACCAATAGAATAATTACATTAATCCAAATATTGCCCATCGTTGGCCTC  
TACTTTTTCCATCTTTCAGTTAATTTTCGAATTCTATGTCGAAAGAAATACTCA  
TTTTTTAAAGTAATCTTGTC AAGTAGCCATTTTTCGATTCTTGCATAAATGAGT  
GAGGTTCTGTACGCGAAAAAATGTAGGTAACCAAACAAGCTGTATTCAGAT  
AAAACATTGTCTGGTGTATACAGCGAGTGGGGTAATATTTTCATTTGTGACGTT  
TTCTGAGAAGTGGTTCACCTGATTTTGC AACATGATGTCGTGCGTTATCGTATTT  
AAAAATAAGTCTATCATGTCGGTTATCCTATTCTGGCCGTTTTTGGTTGGCCGT  
TTTTGGTTCTGTGTCTGTAACGTAAAAATCTCCGGTTCTAATGATTTGAAGCC  
AGTTTTTCACGTTTTTTGTGTGTCGTAACATGTTTCATCATATGCCTAAACCGACA  
AACTATAACTTTTAGCGGCTGGTTTATTGAAATAAAAGAAGGTTTTTAACTT  
CTCCGCAA AATTGACTTTTGAGACACAAATCTCTACATTTTAACTCGAGAAA  
AATATGTTATAGTTAATATTATAAGCAGTCACTTATTTTGTGTTGTAAAGGTGT  
TTAGTTATTCTTTCAAATGGTATAACATAGGGGGCTGTGCAACTGACCAAAAA  
TCAGTGGCGCCAGCTTTTAGCAGAA**CTAATTCAGGGACCTAA**

### *20 – Mariner20-Andl*

#### **MITE**

##### **Short description**

A total of 49 copies of this element were found in *An. darling* genome, the larger showing 759 bp. TIR are 25 pb long and TSD consisting TA nucleotides. The ORF finder found 6 short ORFs, indicating this element is not able to produce active enzymes. The short length, conserved TIR and TSD suggest this element can be a MITE.

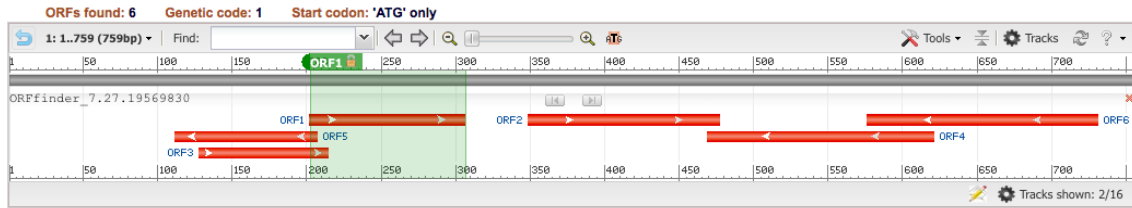

**Figure 20** - Orf Finder scheme of ORFs detected in the Mariner20\_Andl element

> Mariner20\_Andl (sequence) Red = TIRs

AAGCCAGTCCATTTAGAACCTGGAATTGGAGCTGTCGCAACAATTGGAGAT  
 CCCATACCAAATCATTATATTACGGGCAAATTTATCTCCGTAAATAAACCAAAC  
 CCTTCCTAAATCATTCCATCTATGAACGGCAAAGTCAAATCTGTTGCCTGGTAT  
 TTTTAAATTCATTTTACGTGTGTTCCACCGTCCATCAAATGCATGGTTTGA  
 ATTCGGTCAATAGTTGTTTCATACAGATTCCTGCACGGATTTGGGCAATCAAG  
 CTGTGCTCTAGGGTCTATTTGAGTATTTCTGGTATGATACGACCTTAAAATT  
 TCCTTTAAACATATTTGCCGAAGTGTATGACGTCTGCGGTGAGTTTTGTGGT  
 GGAATCACGCTGGGAGATCCCAGGATTGTTGATTTACTTTTGTCTGCAGAATT  
 GGTTATTTGTTACACTTTTCAGCTATTTTATTTTGCTAGAATCAAGGTAAAAGT  
 CCTCCCGTAACGTTTGCATACGGTATTTTATAGTTGAGTTTGGAAATTGCAAAA  
 CTTTCGCGATTTTCTCCAGCCAAATTTTAAATTTAAGTTTAAATAATAAGTGT  
 GCAGATTTATTTGCATCGAGTAAGTGCCCCATTGACAGACCCGTCGCCAGAA  
 CAATTCGGGTCTATTAACACTATAATAGACCTGGTTGCATACATTTTGCATACG  
 GGTAACAACACTAGAGGCACTGCAGCGATTAAAAACATGTGTCCAGATTCTAAA  
 TGGATGGGGCTT

## 21 – Mariner21-Andl

### MITE

#### Short description

A total of 1 copies of this element were found in *An. darling* genome, the larger showing 796 bp. TIR are 30 pb long and TSD consisting TA nucleotides. The ORF finder found 6 short ORFs, indicating this element is not able to produce active enzymes. The short length, conserved TIR and TSD suggest this element can be a MITE.

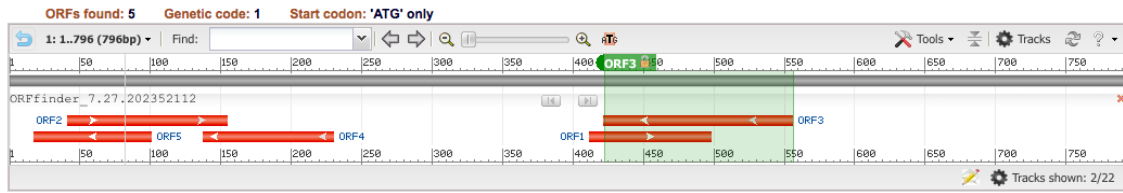

**Figure 21** - Orf Finder scheme of ORFs detected in the Mariner21\_Andl element

> Mariner21\_Andl (sequence) Red = TIRs

```

TTAGATTGTTTCATGTTATTGCGTTTTTCTATATACAGATGGAAATGACAAT
TGTAATAGCGATTTCTAGCAAAGTTACAAATGTATCCTTTTGCCATTTATCAGT
TGTCACTTTTAGCTTGTTTTTGTTAACGTTAGCAAGAATTTGGTAGGAAAAGA
GTGCGCGTAATTTTCGTTTATAATTGTGTGTGTAGCGTCACTTTCAATGTGGAGT
ACTAAAGCAAACATATTCGACACATTTTAATGTATTACTTTTAGAGAAGCAAA
TCTGCCGGGCATGTTCCAAAAATAATATGTGATAAGTATGGTAGGGAATCAAT
AAAATAGAGTTTTTTGTCAAATTGGTTTAAATACACATGTTGCAAAAAAAAG
AAAGATTAAACAAATGAACAATAATGGAAATAATTGAATGTCTACTGTAAAA
ACCTGGAAC TGGAAATGGAAGCTACTAGAATGCAACCCTCCACGAGCAACGT
CCAGAAATTATAAATCATAAAAAATTTCTGCCAGGACATTGCTACAACGTATA
CATTTTTAGTGCCCTCGCCAAACATTTAGAGA ACTAAGCTGGGAACTTTTGAA
GTACCCGTCATATAACCCTAACCTTCCACCATTAGCGTTAGTAGCGATTTTTGC
AGATCTCCCAGTGTGGTAAAGCTCTGATGGAGAAGATGACACTGTAAATCG
AACTTCTCTCAGTTTTTTAGACGATAAAAACGATAGATACAAAAAGAATTTAAA
AAACGGTATTTACTTTTCGAGGACAAAAAAGAAAT TACTTATGAAAGAACCTA
A
  
```

## 22 – Mariner22-Andl

### *Degenerated element*

#### *Short description*

A total of 2 copies of this element were found in *An. darling* genome, the larger showing 1755 bp. TIR are 25 pb long and TSD consisting TA nucleotides. The ORF finder found 15 short ORFs, indicating this element is not able to produce active enzymes.

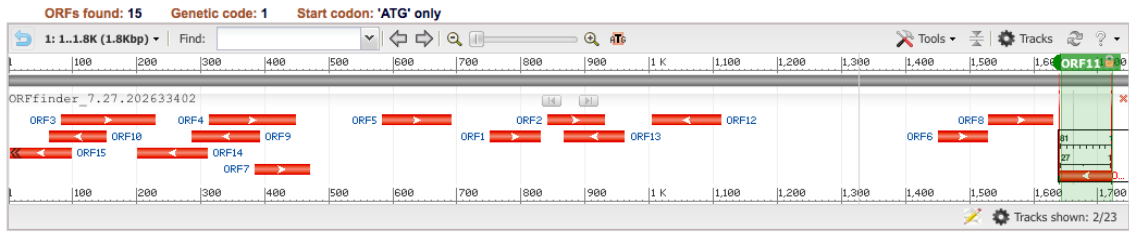

**Figure 22** - Orf Finder scheme of ORFs detected in the Mariner22\_Andl element

> Mariner22\_Andl (sequence) **Red = TIRs**

**TTAGGTTGTTTCATAAGTAGTTGGG**GTTTTTGTAAATCGATAGTAAATACCGGTA  
 TTAAAATACTCAAACGAAGACTGACCAATGATATATATTTTCATTTTGTCTCT  
 GATNNNNNNNNNNNNNNNNNNNNNNNNNNATCTTCTGGATTTGCCAGCCATGGATCTT  
 CCCGATTTTATCTTCAAAAAAAGTGAAGTCCTATTTTCATATTGCCATCC  
 TTCTTAAAAGTTTAAACATACGAAGGGTGAAACGAAATGGCTGCCTGAGGAA  
 TGTTCCCAGCCAAGTTCTTTCAATTTTGGCGATGGCATAAACATGTATGCGG  
 TCTAGCGATGTCCCGGTGCAATGTGAAATCTTTGCAATTGACAAATTCTGGTT  
 GTTCTCGTGAATGATTGCATTCAATTTGACATATTTGTTTCAGTTTGTTCATT  
 CTTCAAATCCCACCTAACTAAGAGCATGTTTCTCCCGTGGTGAATATACCCTT  
 TGGAGGTCGTTTGAAGTGACTCATCACGCTCCGAAAGCGATCATTTTCTATTG  
 TTATTATTGTAAACAGTACAACAGTGCAACAATGTAAACTTTCAATATCTATGA  
 TGATTAGCTCGAAAATTGATCGATTTTCATAACGTCAAAAAGCTAATTACAAGT  
 GTTAAAGTCGTTTGTAAAATGAATTTCAATCAATTGATTATACCATCCTAATATC  
 AAGCTGTTTAATGACCAAACCTATTGAATATGAGGTCTTTCTTTTATCGTTAA  
 TATGTCTGACGATTTGTCAGATATAACCTTTCTTCGACCGAATGTAAGTTATA  
 TGACGATGTGTCTCGGTTAATGCTTTAATTTTCGTCAAATGCTTTTCGGACGGTT  
 TGAAAGTAGTTCAACTTTTAGGGNNNNNNNNNNNNNNNNNNNNNNNGTCCCGGT  
 GCAATGTGCAATGTGAATTTTGAATTTGGTCGTTTGGTTCCTTGAAGCGGCTC  
 ATAAGTTACCACAAATGTCCTTCAACACGCACCTAGCTAAGAGCTTAATTTTC  
 CTTTGGTGAATCTACCCTTTGCAGGTCGTTTGGACGGATCACGCTCCGACAGT  
 GATAATTTTCTATTGTTTTTATTAATAAATCAATGCCACTTTGAACATCTCTGATGA  
 TTAGCTCGAAAATTCGCTCGATTTTCATAACGTCAAAAATCTAATCACAAGTGT  
 TAAAGTCATTTGTAAAATAAATTTCAATCAATTGATTATGCCATCCTAATATCAA  
 GCTGTTTAATGACCAAACCCATTGAATATGAGGTCTTTCTTTTATTGTTAATA  
 TGTATAACCTTTTCGTTCGACCGAATGCACTATTATATGACGATGTGTCTCGATTA  
 ATGCTTTAATTTTCGTCAAATGCTTTTCGGACGGTTTGAAGTAGTTCATCTTTG

AGTGTTTCTTTCTTCCAGATCGGAATATTACTAACCAATTATGACAAAACTG  
 CCTTTTAATGATTCCGTACCTCACTCATCACGTATTTTTGCGCAACATGCGCTG  
 CGGTTTCTCTTCTCTAAAAATTATAAAGTAATATGTGCCGAAATTTTCGCTTTG  
 GAATCCGTATTAAGAGTGACGCCACACTTACAAATATCAACGATATTATGCC  
 ACTTTTTTCCCAAGAAAACCTAACTAAAAGTGACAATAATGAATTCTAAAA  
 GGATCATTTTTTGCATTGCTAAAAACCGTTAAACAATTGGTCATTGGATTGGA  
 AAAATTGGTCATGAAAATGGA**CGCATCTACATATGAAACAACCCAA**

### 23 – Mariner23-Andl

#### Degenerated element

#### Short description

A total of 200 copies of this element were found in *An. darling* genome, the larger showing 1212 bp. TIR are not found. The ORF finder found 9 short ORFs, indicating this element is not able to produce active enzymes.

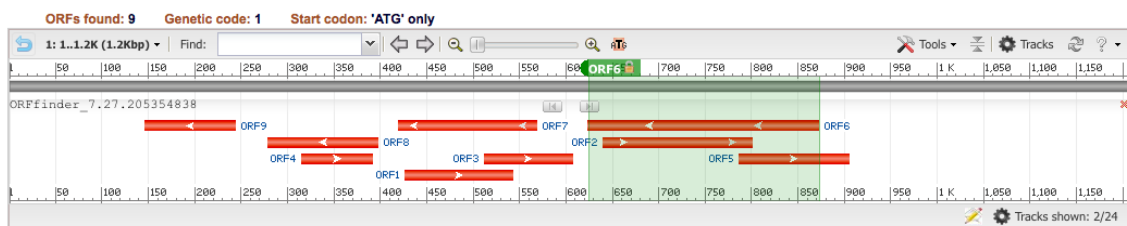

**Figure 23** - Orf Finder scheme of ORFs detected in the Mariner23\_Andl element

> Mariner23\_Andl (sequence) **Red = TIRs**

AAGCATGGAACAGTTAATATTTGGCCGCACAAAATAGGTCATATCTCAGCCAA  
 AAAATGACGTATAAAGAAAAGAAAGGTGTCATTTGTAGGTTTTCTTATTGCC  
 TTTAATAAGAAATATTGATGCAAATTATTCATTAGTTTTTTATATGACTTTTTCA  
 ACTTTTACTTTGACATCACCCAAAAATNTTTGCACAGTACTGTAGGTCACATC  
 ATTTGCCCTCTTGTTGCACATCACCTCATTTCAGTTGGTTTTTATACATTTCT  
 GATATACTTTTTAAGTTTCCTTATGATAATTGTCCAATAGAAATCGATGGAACG  
 AAAATCCAGACATTTTGNTGGATTGATAGTTTTCCCTATGAAATCGATCTATTT  
 GAATACAAAAAATTAACGCCATACCTTCGGCAAGAACAGCTACCTAAATCAT  
 GCCAACTTACACAGGATCATTGGTGGACAAATGNAGGACAAAATCCTTTTC  
 TGTAGACTCTTTTCTTGCACAAATTTTGAATGAACGTTGCCCAATGGTGA



AAACATTTGATTTGTCGCNACAATNTCANATCCCATGCCAAATCATCATCTTA  
 NGGGCAAATTTATCTCCGTAATAAACC AAAANCCTTCCTAAANCATTCCCTCT  
 ATGATTGGCAAAGTNANTNNTNNTNNNNNAANNNTTGTNNNTNCAGNNTNNTNN  
 GNANNNNCAATCAAGCTGTGCTCNAGGNNCTNTTTGGNTATTTTCTNGCNT  
 NTANGACCTTAAAANTTCTTTTAAACATATTTNCCNAACTGTTATGNCGNCTG  
 TCGTGAGTTTTNTTNGTNGAATCACGCTGAGAGATCCCAGGATTNTNGANT  
 CANTTTTGTCTGCAGAATCGGGCATTNGTTACACTTTTTCGGCTGTTTTATTTN  
 CTAGAATCAAGGTAAAAGTCCCCAGTAACGTTTACATATGGTATTTTGAGTT  
 GAGTTTGNAATTTCAAGACTTTCGNGGTTTTTTCTCCAGCCAAATCGANTTT  
 TAATAGTGAGTGTGCAGATTTTTTTTTTCNCCCTTCGCGTTCATCGGCGATAAC  
 TTTTGAAGGCGTGGATCAATTTTGACAAAAAATTTACCACTAAATAAACAGA  
 CTACAATGATTA AAAACGCTGTCAACGGAATGGCAAAGTGACCACTAGGCGCG  
 CTGCAATGATTA AAAANAAGCGGCCAAATATTA ACTGTTCCANGCTT

## 24 – Mariner24-Andl

### Degenerated element

#### Short description

More than 100 copies of this element were found in *An. darling* genome, the larger showing 394 bp. TIR are not found. The ORF finder found 3 short ORFs, indicating this element is a fragment of a mariner element.

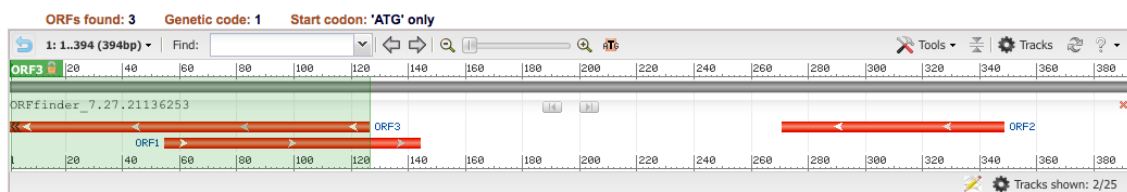

**Figure 24** - Orf Finder scheme of ORFs detected in the Mariner24\_ Andl element

> Mariner24\_ Andl (sequence)

GCCGTGGCCACACGGGGCGAAAATTTGCGCGCAAATTTGCACATTAATGCCA  
 AAATGTTTTTCGCTTCGTGTGGCAGGGGTAAAAACCCGAAAATTTATGCCGAA  
 ATGTCAAACGTATTGTTTTTCATCTGTGTTTTGGCCGCTGAAGTTGATTTCCGA  
 ATAAATTTTGCAGTTTTTAAACGATTTTGTGCTGTTGCTGTTATATTTATATTAA  
 AAATGCAAAAACAATACGAAAAGAACCTACATTTTCGTAAATAAAGCGTTCG

ATAGCGTCAAGGGTTCAGCGAAAAAGTCCGCGGACGTATAAAAAGTTTGACA  
 GCGTGTAAGGGTTAAGCGAAACCGTTTTGGCATTATTTTTTCGTTTGGCCTA  
 GAGTTTTTCGCCCCGTGTGGCCACGGC

### 25 – *Mariner25-Andl*

#### *Degenerated element*

#### *Short description*

More than 100 copies of this element were found in *An. darling* genome, the larger showing 394 bp. TIR are not found. The ORF finder found 3 short ORFs, indicating this element is a fragment of a mariner element.

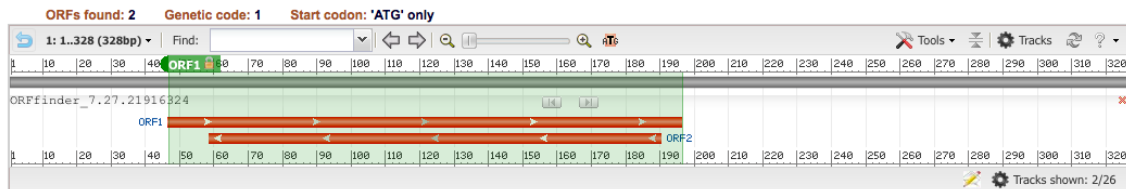

**Figure 25** - Orf Finder scheme of ORFs detected in the Mariner25\_ Andl element

> Mariner25\_ Andl (sequence)

GCCGTGGCCACACGGGGCGAAAACCTCTAGCGCAAACGAAAAATTAATGCC  
 AAAACGTTTACGCTTGCCGTTTACATGCTGTCAAACGATTATAGGTCCTGGA  
 GCGTAAAACCTAGCGTAAAAGCTGTTTGCAAACGGAGGGCTCGCAATATGTT  
 CTTTTGTGGTTTACATCGATAGTGAGTGATCATTGCTAGTGTGTTCAATCCTT  
 TTCTTCCACAAAACGATTTTAATTTCTCAACCCGGCCACGTAAACATATCGA  
 AGCGTAAACGTTTTGGCATTATTTGTAAATTTGCGCGCAAATTTTCGCTCCG  
 TGTGGCCACGGC

### 26 – *Mariner26-Andl*

#### *MITE*

#### *Short description*

A total of 21 copies of this element were found in *An. darling* genome, the larger showing 702 bp. TIR are 28 pb long and TSD consisting TA nucleotides. The ORF finder found 3

short ORFs, indicating this element is not able to produce active enzymes. The short length, conserved TIR and TSD suggest this element can be a MITE.

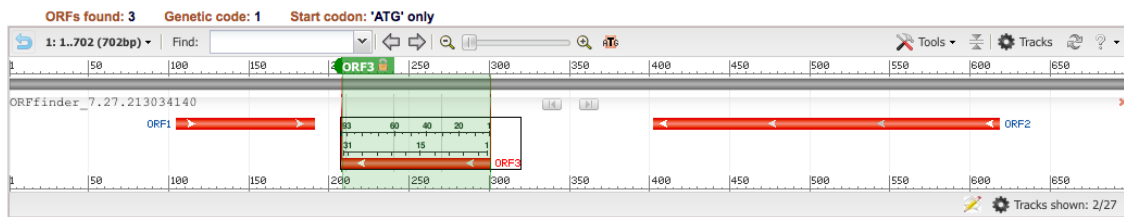

Figure 26- Orf Finder scheme of ORFs detected in the Mariner26\_Andl element

> Mariner26\_Andl (sequence) Red = TIRs

CACTCTGTCCAGTTACTATAAGACCACCTGTGATTTTAATAGTTTCTCACTACT  
 GATAACAGTAACAATTTCAATTCGTATCATTATTTGTTGGTATTGGTGAGATGT  
 ACTTACAGTGCAATTATCGCATTTTTACGTGCATATACTACACAAATACACGCA  
 TTTCTTTTGTGTGTCGATCCGTCTAGTTAGTATAAGAACAGTTCGCTTAGTCCGC  
 GTTTTACATTTTTGGAGGTAAATTCACAAAATGCCCAAAGGAAAAGTATTA  
 ACTGACCATGAGAAAGGTCAAATAAAAGCATTTTGACGAGAGAATGTAGGA  
 ATACGAGAGATTGCACGACGGTTAGGCCGATCTCATCAGGGGGCACTAAATT  
 TCCTAAAAAATTCGCAAGCTACGGAACATCATAAGGAAACACGAAAAAC  
 AAAGCTGTCTAACCGAGACAAAAGACAAATAGTGAGAATAGCTTCAAATTCT  
 TCGATCTCGTTAGCTAAAATTATTTTTTTAAATTCGCTTAAGTTAGAAGTGTCG  
 AGAGAAACAATTCGCCAAGTTTTAGTGAATAGCCCGTTCATAAAAAGAGCTA  
 AGAAGACAAAAGCCCCTAATCTCACACCGATCCACATCGAAAAACGATTGAC  
 CTTTGCCAAAATAATATGAGCCGTCAATGGAATTCGGTACGGTGGTCTTATA  
 GTA  
 ACTGGACAGAGTG

### 27 DNAUnknown-Andl1

#### Degenerated element

#### Short description

More than 100 copies of this element were found in *An. darling* genome, the larger showing 555 bp. TIR are not found. The ORF finder found 3 short ORFs, indicating this element is a fragment an unknown element.



GGTAAAAGACTGAAATAGGCCCCCCCTCACGGTGAGTTACTGAGTGACCG  
 AAAAAATCGTTAATTACCACTTTTTAGATAAGCAAACCTTCATAAAAATATGC  
 GGAAACGTAAATAAATGTATTAGGGGAGGGGGGAGGGGTGGAAAAGTTACA  
 TTTTACCAGTAAACAACGATTTTTTCGGTCACTCAGTAACTACCGTGAGTG  
 GGGGGGCCTATTTCACTCTTTTACC

### 29 DNAUnknown-Andl3

#### Degenerated element

#### Short description

More than 60 copies of this element were found in *An. darling* genome, the larger showing 540 bp. TIR are not found. The ORF finder found 5 short ORFs, indicating this element is a fragment an unknown element.

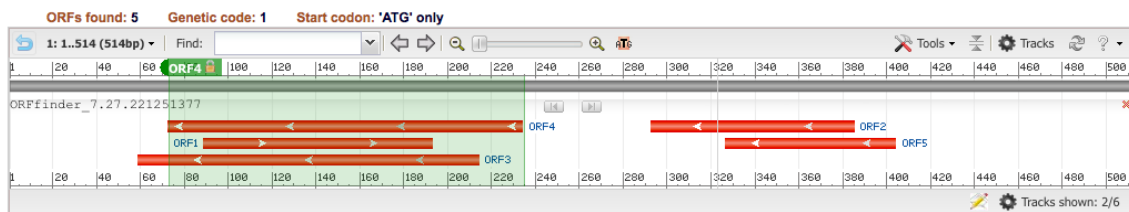

**Figure 28** - Orf Finder scheme of ORFs detected in the DNAUnknown-Andl3 element

> DNAUnknown-Andl3 (sequence)

GGTAAAAAACCAAACATACACCTCAACCGATTCAAATAATTTAGCGGTTAT  
 CCATTTCAAATTTTGCCGTTAGATAACCGATAGAATGAGCCGGACACAGAA  
 ATACATGTGGAAAGTGGAGGAGGGGTGGGGAGGGAGCGAGTACATACCTAG  
 TACATCGCTTGTACCTCCCCCGTCCCTTCCAGATAGATAAAAAGATGATTTA  
 GACATAATAATTGTCCCAAAAACATACACACCTTTTCAGTTAAATATCTTTGAA  
 AAATACATTATAAACGTAAATAGTGCTATTACGGAAGAGGGGAGGGAGATG  
 CCATTACATTTTCACTGTGCGAAAGATAATATTTGGGTAGTTTTTCGCACCATAA  
 ATTGATTTAATCTCATGTTTAAAGTTCTTGTTCATTCCACTGGTTATTTAACGG  
 CCAAATTTTGAAATGTTTCGGCCCCTAAATGTATGCAATTAGAATCGGTTAGCC  
 TACCGAATCGGTTGAGGTGTATATATTGGTTTTTTTACC

### 30 DNAUnknown-Andl4

#### Degenerated element

**Short description**

More than 40 copies of this element were found in *An. darling* genome, the larger showing 478 bp. TIR are not found, TSD shows TTAA nucleotides. None ORF finder was found by Orf finder software, indicating this sequence is a fragment an unknown element.

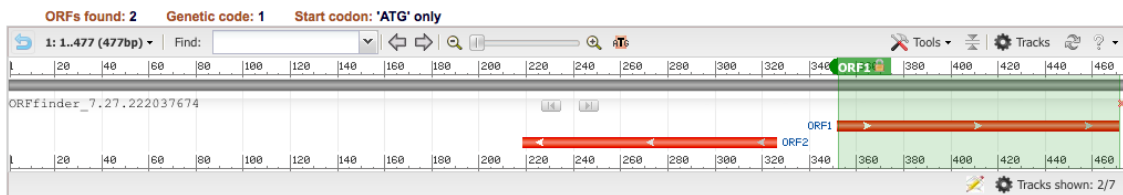

**Figure 29** - Orf Finder scheme of ORFs detected in the DNAUnknown-Andl4 element

> DNAUnknown-Andl4 (sequence)

```
GCTGCTTTCACATCGAGCGGTTTAAACGCCACTAATAGACGCAGCAGGTTT
TTTGACGCAGAAAACACGGTTGTATCACATCAAATATATGGAAGTGTTACG
TAACGCACCGAAAGCTATTTTTTGGAGCTTTTGAAGAGCTTAAAAGTTGGCG
TTTTTTTTTCGGATCTGTAAAAATCTACAGATTGTGGCAGGTTCTGAGCCGACT
GTAGCAGGCTACGCAAGCAAGCCAGCGTTGCCCTTTGGTTTTGCAATTTGTT
TTGGCAGGAATGTGTTGAAATCCGGGTAATAACTGTTTTGCGTGAAGATTA
CTATTTATCATGATTTGATAAGGTGGCGGTAGTGATATGGTGCTGTTTTTCGTG
TATTTTAAATCGGCCTTCGCGCAACCTAGGTGTGAACAACAAATTAAGCTTTT
GCGTCAAAAAACGCCAACTTTGGCGTTTTTAAAAACGCGCTCGATGTGAAAG
CAGC
```

**31 piggyBac1\_Andl****Truncated element****Short description**

A total of 27 copies of this element were found in *An. darling* genome, the larger showing 2954 bp. TIR are 19 pb long and TSD consisting TTAA nucleotides. The ORF finder found 20 ORFs, 3 larger ORFs codify 226, 127, 92 aa of piggyBac transposase, showing these copies are truncated.

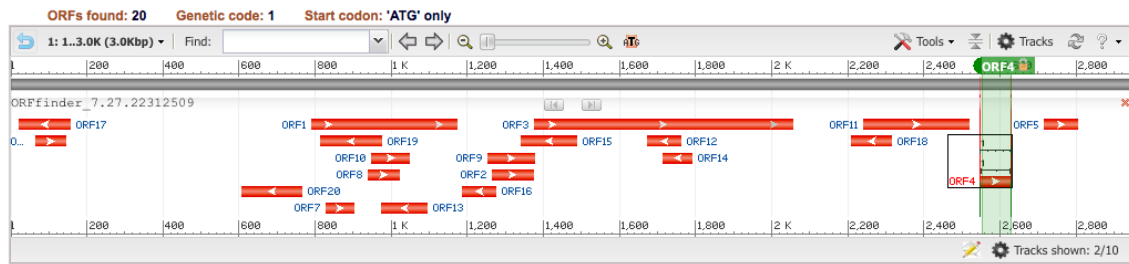

**Figure 30** - Orf Finder scheme of ORFs detected in the piggyBac1\_Andl element

(Blast - piggyBac transposable element-derived protein 3-like -Trachymyrmex septentrionalis)

>|cl|ORF3

MKEDKVAPIRDIWTMLNNLAKYYKPSEYLTIDEQLFPYRGRTKIKQYIL  
SKPAKYGIKVVWICDAVNSYPLNGQIYTGKSSTGREKGVGERVIKDLAAA  
YRGSGRNITADNFFMSMPLAEFLLSWNLTIIVGTLRKNKPYIPPAMTVLKN  
REPFSSVFADKDKITMCSYMPKKGKSVIMLSTMHQEAKIDDGIKKKPEII  
EFYNWSKAGVDTMDKMLGRYSTQRCT

>|cl|ORF1

MSCVYIFKLFQEHEYGYDSEDEDETDVESDQERNDNEVNLGEDGDMTAKD  
GTKWTKTPAVEHQAALRNIVRQKSGPVKNTEMLSIFELFKLYFSPEMADI  
IIRHTNKKATRCYDAYNLRNPTKKPLK

>|cl|ORF11

MRNFSTKLAIESILGKAIHTNAVPSSELSQCHLAAKVIDSTGRKKITG  
VCYMCLGGQSKHRRKTRKSCSICYLPICNEHCIDQTICNQCK

> piggyBac1\_Andl (sequence)

CCCTCGGTTGGGCACCCGGCGTTTACCCCTTCGTTGGGCACCCGGGTACCCG  
GGTACCCAACATCATGTGCATAGCACAGTTGATTGATCGTTTCGCGGCATTAT  
CGATTTTATGATCAAACACTAGTTCGCCACAACATAGTTAAAGGTCTTGGC  
ATC  
TAATTTCTGTTTCACAATGACAACAATACCAAACAAAAACAATAACAAAGCA  
AGATAATTGTATAATTAGCCGAGCGCAAGGTCATTGCCAAGTAGATCGTAAAA  
ATCGCAAAGCGAAAGAAGGGGTATTTCTATTTATTATTTTGTTCGGATAAAATT

GGCCTAGTCAAAACATCAATAATATTATTTTAGTCTAAACAAATCAATTCTTTG  
TTGTGTTTTACTTGACTTTCTTTGGTTGTTTCGCTCGATATCAAAGAGTCGAGTA  
AGAGTCAGTCGTACAAATTCGTCTGACAGAGTAGTCGCTTTTTGGATTTTTTA  
TCTGCGTGCTAGTAACTTGTGTTTCGTTGTGGTAAAATATGGATCTTCCTATATA  
TAAAAGGTGTGGTGTACTTTCATTATATGCAATTTAAACAATACTGTTGTGCAA  
TGGTATTTGTTTTATTAGAATTACCCGCTCGCAGAAGGTGAAATTTGAAAATT  
CGGTGGAACCAGAGGAGTGGGAAAATGACGATGACGATGATGATGATGATG  
ACTACATTCCTCTAACTGAAATACCATCAGATTGCGACTCTTCTGGTAATTTTC  
TTTTTTAGTTTTTCGTGAACATTATCAATCGTAATTCACGAACATAATGTCTTGT  
GTTTACATTTTCAAACATTTCAAGAACATGAGTACGGTTACGATAGCGAAGA  
TGAAGATGAACTGATGTCGAAAGTGACCAGGAAAGAAATGACAATGAAGT  
AAATCTGGGTGAAGATGGAGATATGACTGCAAAGATGGCACTAAATGGACG  
AAAACACCAGCAGTGGAAACATCAAGCTGCTCTCCGCAATATTGTGCGCCAAA  
AAAGTGGCCCCGTAAAGAATACGGAGATGTTGTCCATTTTTGAATTATTCAA  
TTATATTTTCAGTCCAGAAATGGCTGATATTATCATAACGACACACGAACAAAA  
GGCAACACGATGTTATGATGCTTATAATCTACGGAACCCAACAAAAAACCA  
CTGAAGTAGAAAAATTTGGAAATTAATGAATTGTATGCGTTCCTCGGTGTGTT  
AGTAACGTCTGGTGCCAACAACACTCAAATACCGACAATGTGCATGATATGTGG  
CAGTCATATTCCTACCCCCTGTACCGTGCGGCGATGGGCAGCAAACGCTTTCG  
TTACATTAGTCGATTTATTAGATTTGATGATGCCAATACTCGGGAAAAGTGAAT  
GAAGGAAGATAAAGTTGCTCCAATACGAGATATTTGGACAATGCTAAACAAC  
AATTTGGCAAAGTACTACAAACCGTCAGAGTACTTAACCATTGACGAACAGC  
TGTTTCCATACCGAGGAAGAATAAGATCAAGCAATATATTCTATCAAAGCCA  
GCAAAGTACGGAATAAAGGTTTGGTGGATTTGTGACGCAGTAACTCTTATC  
CACTAAATGGCCAAATTTACTGGGAAATCAAGTACAGGCCGAGAGAAAG  
GCGTTGGAGAAAGAGTGATTAAGGACTTGGCGGCTGCTTACAGGGGATCTG  
GCAGAAACATAACCGCTGATAATTTCTTTATGTCAATGCCGTTAGCAGAGTTT  
TTGCTCTCCTGGAACCTAACCATTGTTGGCACATTGCGGAAAAATAAGCCATA  
TATCCACCAGCTATGACTGTACTAAAAAATCGAGAACCATTCTCTAGCGTGT  
TTGCTTTCAAGGATAAAATCACAATGTGCAGTTACATGCCTAAAAAGGGTAA  
ATCGGTTATTATGCTTTCAACAATGCATCAGGAAGCCAAGATCGATGATGGCA  
TAAAGAAAAACCAGAAATAATAGAATTTTATAATTGGTCAAAGCTGGTGT  
GGACACTATGGATAAAATGCTCGGCAGATATTCTACGCAGCGATGTACTTAAA  
GATGGCCTTTAGCTTTTTTTTTAACTATGTTTAGATTATCGTCTGTGTTGCCTCA



TACATAGTATACTGCGAAAACAATAAGAAAGCTGTGGTTAAAACGCACGAAC  
 GACGCTTAATTTATCGACAATTGGGCAGAGAACTATGTAGTTCATTTATTGAG  
 ACTCGATCGAAAAATCCTCAAATAATGAGGAACTTTTCAACAAAACCTAGCGA  
 TTGAAAGCATTCTAGGTAAAGCAATACATACGAATGCTGTTCCATCATCTGAT  
 TCGGAATTATCTCAGTGTCATCTAGCTGCAAAAAGTGATTGATTCAACCGGGCG  
 AAAAAAATAACCGGGCGTTTGTATATGTGTCTTGGTGGTCAATCGAAACACC  
 GCCGAAAGACACGTAAGTCTTGTTCAATTTGTTATTTGCCAATATGCAACGAA  
 CATTGCATTGATCAAACGATTTGCAATCAGTGTAATAAACAAGTTCAGAAA  
 ATATTTAATGTTTCAATGGCATATATAATGATTCATCTCCGTTCCCTTATGTAATAA  
 AACAACAACAATAAACAATTTAAAAGTAAAAAAATGTTAAATTCTACTTAATT  
 ACTCATTAATTGGTCAGCGCACATCAATAAATGTTGACAAAAGTGTTATTTT  
 GTGTTTATAAACATAGCCCATATGTATAGGCAACGCGCTGGGTACCCCGGTAC  
 CCGGGTGCCACTGGGCGAATGTAATTTTTATCGGCCATAATTACCTTTAAATA  
 TTAGTTATCAAACAATTCCGATGCTATTTTCGGCGTGAAATGAGTTATACTCTG  
 GGGATCCGGAGTTTCGTGAAAAAATATTAACGGGAAGTCATTCATTTTTTCTT  
 TTAAACTTGAAATGGATACCCGGGTACCCGGGTGCCCAACCGAGGG

### 32 *Kolobok1-Andl*

#### *Degenerated element*

#### *Short description*

A total of 47 copies of this element were found in *An. darling* genome, the larger showing 751 bp. TIR are 14pb long, and TSD is constituted by TTAA sequence. The ORF finder found 4 short ORFs, indicating this element is not able to produce active enzymes.

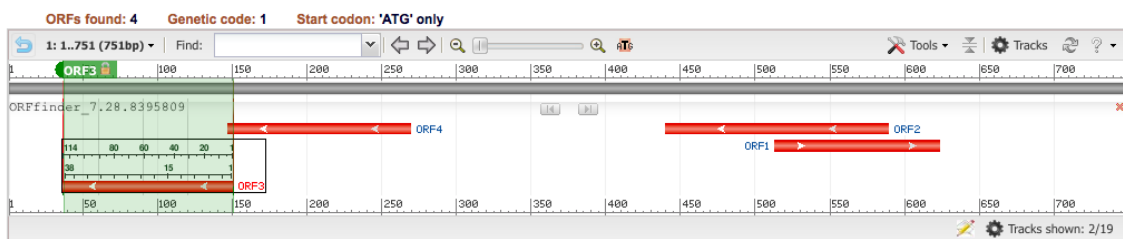

**Figure 32** - Orf Finder scheme of ORFs detected in the Kolobok1-Andl element

>Kolobok1-Andl (sequence)

```
GGGGGGGCTTCGGTATTTTATTTTAATTCTTCGCATTTACTTTTTTACATTTTTTA
TGAGTGCTTATCCTTTCAAGAGTATTGTGTAAAATTTGGGATCAATCGAAGC
AAAAC TGACAAAGATATTGATTTTTGAAAATCCGCCTTTCATACAAGGCTCAA
AGCATCTCGCAACTTTGAATCGCGATTCCCAAACCTACGTTTTTCAAAGTCG
GTGCCCATCGTAGCATAAAAATACTGGACCGATCGATTTGAAATTTTGAACA
CATAATCTGTACTACTATTTGCCAGGTAGCCCCGTCGAGTTTTTATAAAAATTGT
TGATACTTTTTTTTAAATAATTTTTTTTAATTATGTAAAGTGTCGTTTTTTGAGGC
AATATCGAAAAAGCATCACTTTTTCAACTTCAAAAATCTGCCAAAAATCGA
AAAATGGGAAATTTAACAAAACTCGACGGGGCTACCTGGATAAACTTATAA
TCTAACAAAAGAATATTCATTTGAATATTTCTGATGACCCAGCACGTGGCTAC
GATGGGCACCGCAAAAAGTACATTTTTGCAAACCTTGCCTTTCTAGATTGGATG
CCATGAACGTAGTTTTGATCAAATCTTCCCCAAAATAGAACCAAATATTCTTG
AAAAGTTGTAGTTTAATATGACATTATTTGAAAAATAAAGTTGAATGGTTT
CTTCACTAAAATCGTCAAAAATAAGCCTTTTTTTGACCCGAAATAACCAAA
GCCCCCCC
```

### 33 Helitron1-Andl

#### Degenerated element

#### Short description

A total of 85 copies of this element were found in *An. darling* genome, the larger showing 1327 bp. TIR are not found, as expected. TSD consisting TTAA nucleotides. The ORF finder found 6 short ORFs.

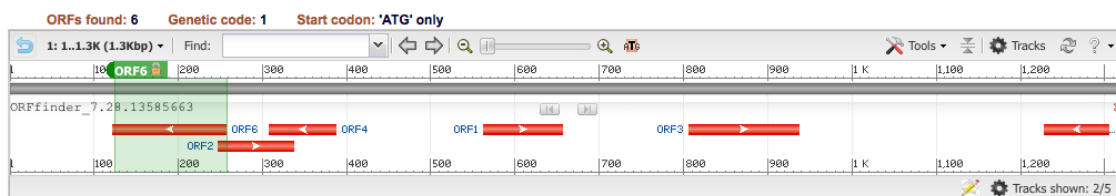

Figure 33 - Orf Finder scheme of ORFs detected in the Helitron1-Andl element

>Helitron1-Andl (sequence)

ACTAGTTGCCCCGACAGACTTCGTA CTGTCTTTGATCGGTCGTGGGTTTATCG  
TATACAGGAACTTTAAAATTTCACTAGATATAATTTTATCGATTCCATAATTTGG  
TAGTATTCGATTTATCAAAGAACCAAATCAATAGCTAGGTCAGTTAGTGATGT  
TGGAATAGAGATACCACGTGATTGTAAATATGAACTGGAAAGTTAACATGAT  
GTTTGAGTTTTAAGGCTTTGCCTTTTCGGGCTAAATGACGTCATTTGGAACAAC  
GAATTATATTTTCCCAAGTATTTTAAAAAAGTTTGACTTTAGTATTCGGCTT  
GCACATAGCTCGTTAAGTTCAAATGCTGTGTATTTAACGGCATTACAATACGA  
CACACTTGATCCATTTTTCCCGGTATTCAGCTTACGATGATTTAAATAGTCAC  
ATGGTAGATCATAACTAAAAGCACCGCACTTCAAATTA ACTCAAACGTCGATC  
GATCAGATCGAGGGTCTTTCTTTTCTCTCGGGCATTCTCGGTGATCATTCCAAT  
CGCAAGTTGTTCTTGATAGATAGGATATGTTGGTATTGCTTTCTATTACTATTCG  
GTTACTGCTGCTTTATATGTTTGTGCATGCAATTCCGATCGTTACCATT CATAAC  
CCGATACGTTGAAAATCGTCAATGATAATAGGCACGCAAAACAATAATCAAA  
AATTAATATAATTCTTGATCAATTCAAATACTTTACA ACTAAATGAGATTTTATT  
ATTGTTTCATGTAAATTGACTTCTGAAACTTAAAGCAACTTCTTAATTA ACTAA  
TGACTATCCTATCTTCCCACCAATCCAATCCA ACTATCCAATTTTCCCACCCAT  
CACTCTGCTCTGCAAGATGTACGGAATGGAGGGTGGTGGTGGTGGATAGGGG  
AAAGAAGCAAGTAAAAGAGTATTAAGCGAATCCAATCAATTTAGAAATCATC  
AAAACCTAGGAAACGATACCCATATTGCCCTAGGATGAATTTTAAGGATTGGG  
GTTGTATGGAGGCACCCCTTCCCCCTATCCGATATGAACCAAATTTTGTTCAT  
AATTTCTCAGGTGACCATCAACA ACTGTGCAAGTTTTAATGGTATTCGGTTCA  
TAACTTGCGCAGCTATTAATGTTTTTAACAATCAAGTGTTAGGGAAGGGCAGG  
AAGGAAGGTAGCGGGGGTCTTAACCAAGCCTATAGCACTCACCGGCCCT  
AAAACCCTCCAATACTAAATTTGGAGTCAATTGGCCCAGTAGTTTCGGAGTCT  
GTAAGGGACATCCGGACAGACATGATTCATTTTTATATATATAGA

### ***34 Gypsy1\_Andl***

#### *Putatively active element*

The sequence shows a full length (5366 bp long) with LTR having 210/208 pb, and a large CDS coding the polyprotein. However, the CDS is interrupted by assemblage problems, represented by NNNNN in the sequence.

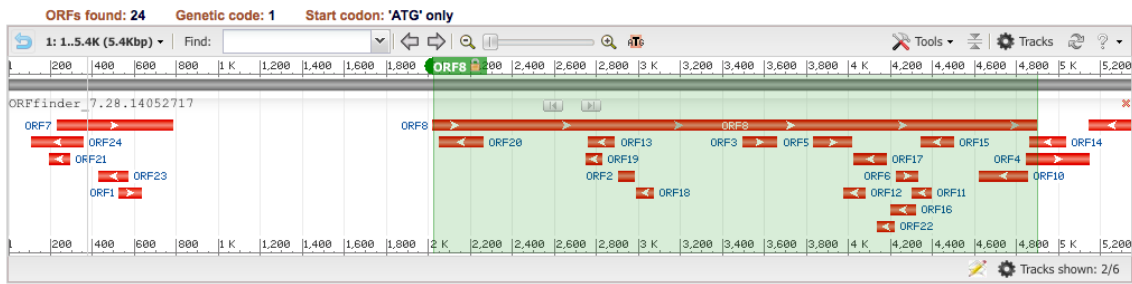

**Figure 34** - Orf Finder scheme of ORFs detected in the Gypsy1\_Andl element

(Blast Full=Transposon Ty3-I Gag-Pol polyprotein; AltName: Full=Gag3-Pol3;  
 AltName: Full=Transposon Ty3-2 TYA-TYB polyprotein; Contains: RecName:  
 Full=Capsid protein; Short=CA; AltName: Full=p24; Contains: RecName: Full=Spacer  
 peptide p3; Contains: RecName: Full=Nucleocapsid protein p11; Short=NC; Contains:  
 RecName: Full=Ty3 protease; Short=PR; AltName: Full=p16; Contains: RecName:  
 Full=Spacer peptide J; Contains: RecName: Full=Reverse transcriptase/ribonuclease H;  
 Short=RT; Short=RT-RH; AltName: Full=p55; Contains: RecName: Full=Integrase p52;  
 Short=IN; Contains: RecName: Full=Integrase p49; Short=IN)

>|cl|ORF7

```
MDKKSNOPTFPEAAIASPGRTISPTGTPREQSATKNQEPQVSSSSQESAM
LQIIQMMQQQRQQQLEMFKILMKNQLETPGKTLLPIPEQLMEMLASAMN
EFRYDAENNSTFASWYSRYEDLFHEDAERLDDAAKVRLLLRKIGQQEHER
YTSFIMPKPCRDLTFSETVATLTSFLSTKETLLK
```

>|cl|ORF8

```
MSTVGHCKRHQCRKATVSPTCASGDTLHLMGEFEAELSIEKQRRNAVIRV
SEQPQLRLLGTDLVESFELWSKPIDAFCCAISNAPSTSTTLKTVRTKFPE
IFRPELGKCTKTKVKLALKEGSTPVFCPKRPVAYAMVDAVDQELDRLEAL
GIITPIDHSEWAAPIVVVRKANGTTQICGDYSTGLNAALQPHQYPLPLPE
DIFAKLANCTVFSQIDLSDAFLQVEVDPNSRQLLSINTHCGLYQYNRLPP
GVKITPGAFQQIIDTMLANIKGVCGYMYDVVVGGETESEHDKNLNAALQR
IRDYGFITIRAEKCSFGKPEIKYLGHIIDNRGLRDPKAKIEAVRELPIPSD
IAGVRSFLGAINYYGKFIENMRMLRYPLDELKSESNFKWTNDCQKSFEK
FKEILSSNLLLTHYNPKLSIIVAADASSVGLGATISHEFPDGTRKVVQHA
SRALTKAEQNYSQPDREGLAIFAVTKFHKMLFGRHFKLQTDHAPLLRIF
GSKKGIPVYTANRLQRFALTLLLYDFEIEYIATNKFSNADILSRLISKHT
```

RPEEDYVIASLKFEAEVKTIVRSAAAALPLTFEDVARKTQTDSLRRVYN  
SIKNGWESYIPDRELKPFYSRRESLSTVDGCILFGERLVIPAQYQSKCLN  
QLHRGHPGIERMKAIASSYVYWPSIDDDIVQYVGSCTHCVAAAKSLTHAV  
PVPWPKASGPWQRVHIDFAGPIDGDHYLVVVDYSKWPEILRMRTISALA  
TVSALRSVFARLGNPVILVSDNGTQFSSAEFAEFCANRGIKHLKTAPYRP  
QSNQQAERFVDTFKRAMTKIREGRGIIIIGEELDVFLHTYRSTPGAAPDR  
KSPAEVMFGRNIRTCNDLLRPPVRAKIPDLPEETMRSFSQGDVHVKIYS  
GNGWKWFPGVITARIGNVMYMMKTEKRSVKAHINQLFRREADGQHPSQCL  
GFTTEYES

>Gypsy1\_Andl (sequence) Red = LTRs

TGTTATGAAGGTTAGAAGATAGCCAAGGGTTTAGGGAATACAACCCTTGTA  
GAATACAACCCTTAGAATACATGCAAGAATACATCGTTTAGAGAAAAGGGAC  
TATCTCAGTAACGATAGACGGAAAAAGACGTGTGGTTTGTAGGTGTGCGAAT  
ATCAGTGAAATAAAGAAGTGTAACAACCGACTTTATTCACAATCATAACA  
GTGGCGACGAGGATAAAGAATGGATAAAAAATCCAACCAACCAACGTTCCC  
GGAGGCTGCGATCGCATCGCCTGGCCGGACCATATCCCCGACCGGTACGCCT  
CGCGAACAGAGCGCAACGAAAAATCAAGAGCCACAAGTTTCGTTCATCTAGT  
CAAGAGAGTGCAATGCTGCAGATAATCCAAATGATGCAGCAGCAGCGACAG  
CAACAGCTAGAAATGTTCAAATACTAATGAAGAACCAACTTGAGACGCCGG  
GTAAGACCCTTTTGCCGATAATTCCAGAGCAGCTGATGGAGATGCTGGCATCT  
GCAATGAATGAGTTCCGCTACGATGCAGAAAATAATTCAACGTTTGCATCATG  
GTACAGCCGTTATGAAGATTTGTTCCACGAGGACGCAGAAAGGCTTGATGAT  
GCTGCCAAAGTAAGGTTGCTATTACGAAAATGGCCAGCAAGAACACGAG  
CGCTACACCTCGTTCATCATGCCTAAGCCCTGTCGAGATCTAACCTTTAGTGA  
GACAGTAGCAACCTTAACAAGCTTATTCAGCACGAAAGAAACGCTGCTGAA  
GTAAAAGATACAAGTGCCTACAACCTAGAAAAACGTCCGGGAGAGGACTACA  
CAGCTTACGAGTGCAGGGTCAATAAGGCATGTGTTGAATTCAGATACGNNN  
NNNNNNNNNNNNNNNNNNNNNNNNNNNNNNNNNNNNNNNNNNNNNNNNNNNN  
NNNNNNNNNNNNNNNNNNNNNNNNNNNNNNNNNNNNNNNNNNNNNNNNNNNN  
NNNNNNNNNNNNNNNNNNNNNNNNNNNNNNNNNNNNNNNNNNNNNNNNNNNN  
NNNNNNNNNNNNNNNNNNNNNNNNNNNNNNNNNNNNNNNNNNNNNNNNNNNN  
NNNNNNNNNNNNNNNNNNNNNNNNNNNNNNNNNNNNNNNNNNNNNNNNNNNN



CGACGTGGTAGTGGGAGGAGAAACAGAGAGCGAACATGACAAAAATCTAAA  
TGCGGCTCTACAGCGAATTCGTGACTATGGATTTACAATCCGAGCTGAAAAAT  
GTTCTTCGGTAAACCCGAAATAAAATATTTAGGTACATCATCGATAACCGT  
GGATTACGACCAGATCCAGCGAAAATTGAAGCCGTCCGAGAGTTGCCAATTC  
CGTCAGACATTGCGGGTGTACGCTCGTTTCTGGGAGCGATCAATTACTATGGC  
AAATTTATAGAGAATATGAGAATGCTACGATACCCACTGGATGAGTTATTTAAA  
AAGTGAGTCCAACCTCAAATGGACTAACGACTGCCAGAAATCCTTCGAGAA  
GTTTAAGGAGATTCTATCCTCCAATCTGCTGCTAACTCATTATAACCCAAAAT  
GTCCATCATAGTGGCAGCAGATGCTTCATCTGTGGGATTAGGAGCGACAATCA  
GCCACGAGTTCCCGGACGGAACGAGGAAAGTAGTACAGCATGCGTCGAGGG  
CTCTCACGAAAGCCGAGCAGAACTATAGCCAACCGGATCGTGAAGGCTTAGC  
TATTATCTTTGCAGTAACAAAGTTCCACAAAATGCTATTTGGCAGACATTTCA  
AACTTCAAACAGACCATGCTCCGCTACTACGTATATTTGGTTCGAAAAAGGG  
CATTCCAGTGTACACCGCTAACCGTCTTCAACGATTTGCGCTCACGCTACTAC  
TATATGACTTCGAAATTGAGTACATCGCAACGAATAAGTTCAGCAATGCAGAT  
ATCCTATCACGGCTTATAAGTAAACACACAAGGCCAGAAGAAGACTATGTAAT  
AGCAAGTCTTAAATTTGAAGCAGAAGTCAAACAATAGTGAGAAGCGCGGC  
AGCCGCACTGCCACTAACATTCGAGGACGTAGCTCGAAAACGCAGACGGA  
CTCGCTTCTACGAAGAGTCTACAATTCTATCAAAAACGGATGGGAATCGTATA  
TACCCGATCGCGAGCTAAAGCCTTTCTATTCTCGCAGAGAGTCAATTGAGTACA  
GTGGATGGATGTATTTTGTTCGGGGAACGACTGGTCATTCCAGCACAGTACC  
AGTCGAAGTGTCTGAATCAGCTACATCGCGGACACCCGGGAATAGAACGTAT  
GAAGGCCATAGCTAGCAGCTATGTGTATTGGCCTTCCATTGATGACGACATAG  
TCCAGTATGTTGGAAGTTGCACACATTGTGTAGCTGCAGCCAAATCACTCAC  
ACACGCAGTACCAGTGCCATGGCCTAAGGCGTCAGGCCCTTGGCAGCGTGTG  
CATATCGATTTGCTGGACCCATTGATGGTGATCATTACCTAGTGGTCGTGGAC  
TCATACTCGAAATGGCCAGAGATACTACGAATGCGCACTATCAGCGCCCTTGC  
TACTGTATCAGCACTCAGAAGTGTTTTTGGCAGACTAGGCAACCCTGTCATTT  
TGGTCAGTGACAACGGTACTCAATTCAGCAGTGCCGAGTTCGCAGAATTTTG  
TGCTAATCGAGGTATCAAACATCTGAAAACGGCCCCATACCGTCCACAATCCA  
ATGGCCAAGCGGAGAGGTTTGTGGATACTTTCAAGCGGGCGATGACCAAAT  
TCGCGAGGGGAGAGGTATCATCATAGGAGAGGAACTGGACGTATTCCTACAC  
ACCTACCGGAGCACCCCTGGCGCAGCAGTTCAGATCGAAAGTCCCCTGCG  
GAAGTGATGTTTGGTTCGAAACATCCGCACCTGTAACGACTTACTGCGTCCAC

CAGTAAGGGCCAAGATTCCAGATCTTCCAGAAGAAACAATGAGATCCTTCTC  
 CCAAGGAGATGCCGTGCATGTGAAGATCTACTCTGGAAATGGTTGGAAGTGG  
 TTCCCGGGCGTTATCACCGCGCGCATCGGTAACGTCATGTACATGATGAAAAC  
 GGAAAAGCGATCTGTGAAGGCACATATTAACCAGTTGTTCCGTCGTGAAGCT  
 GATGGGCAACATCCTTCTCAGTGCCTGGGATTTACCACTGAATACGAGTCCTG  
 AACCTGCAGCGCAGTCGCAGTCTTCAGGATCAGCTGCGGTGGCCGAGACGA  
 CATCCTACCGGCCGCCAGTTCACCAGCGAATCCCGAGCCAGCAGTGCCGTT  
 TCAGTCTGCAGAGCCGACTGCAGTGGCCGAGTCATCATGTCAGCACACTTCA  
 CCAAAGAGGCTCCACAGGCGGCGTAATCTGTTCGGCAACGGCCGTCCAACCT  
 CGCCGTTCTTCAAGGCCCAAGAAAGCCCCTCAGCGGTTCCAGGCTTAAAGG  
 GGGGAGATGTTATGAGGGTTAGAAGATAGCCAAGGGTTTAGGGAATACAACC  
 CTTGTGAGAATACAACCCTTAGAATACATGCAAGAATACATCGTTTAGAGAAA  
 GGGACTATCTCAGTAAGCATAGACGGAAAAGACGTGTGGTTTGTAGGTGTGC  
 GAATATCAGTGAAATAAAGAAGTGTAACAACCGACTTTATTCACAATCATA  
 AAAGT

### 35 Gypsy2\_Andl

#### *Putatively active element*

The sequence shows a full-length element with LTR having 167 pb, CDS from nucleotide 244 to 4111. However, the CDS are divided in three, which can be due to translational frameshifts that occurs in many retrotransposons. Also, the available sequence is not complete and the NNNs observed in the sequence could explain the first frameshift.

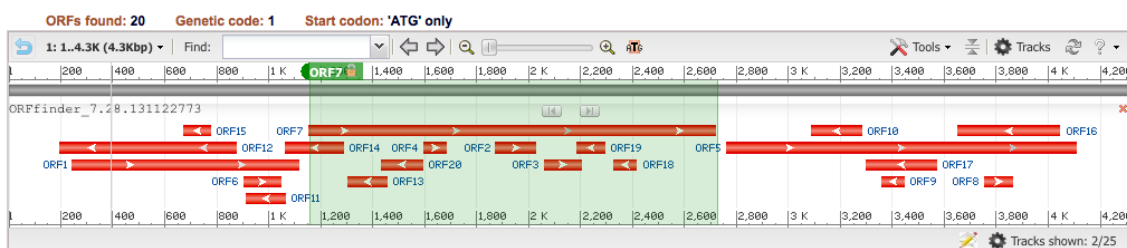

**Figure 35** - Orf Finder scheme of ORFs detected in the Gypsy2\_Andl element



## CDS

| Label | Strand | Frame | Start | Stop | Nt   | aa  |
|-------|--------|-------|-------|------|------|-----|
| ORF 1 | +      | 1     | 244   | 1119 | 876  | 291 |
| ORF7  | +      | 3     | 1152  | 2723 | 1572 | 523 |
| ORF5  | +      | 2     | 2762  | 4111 | 1350 | 449 |

## ORF1

>|cl|ORF1 Blast (poliprotein / reverse transcriptase -Operophtera brumata)

MEPTEACGSGRRRRARGASEEVRCLDSVGKTEDKLSLDSSRVDQEAGTKM  
 TSIVGRPRSTTTASSVKGRRATLQLQRLEAEKAIQLEKLEEEFIREKF  
 RLMEEQLSEDDASASIENSTAQKVTSWITKSQATITSDKEGDVTREIRRM  
 RNELITQRPVAEEPKENAQTTSVGAEVSLWTLTKEQKAARQALPKDLPEF  
 NGDPADWPTFISSFNFSTKACGYQNGENMIRLQRCLKGAAKEAVRGRLLL  
 PESVPSVINALKRRFGRPELLEIMIDRXXXXXXXXKLVVGR

>|cl|ORF7 Blast (blastopia polyprotein - Drosophila melanogaster)

MILEEILETIGEPVVVPTMCFGLFGGIRTKALGRITTTVCIGPEVMMEMM  
 FYVVPRDSMGYEAILGREVLSEVEARVTQERVELVRRKVDEIEPTAETLL  
 CMEEEITVPTKYRKTISDLISNCVPDKTKQFESCPVELKIVPDGQLIPCR  
 DTPRQLAHSEEKAVDQQVEEWLQQGIVRESTSDFASKVVVVKKKDGSSRV  
 CVDYRKLNAGVLKDGFPVIVEEVLNKLQKAKWFTVMDLANGFFHVPVEE  
 ESKKYTAFATKKGLFEFNAPFGFCNSPAAFIRFVNYVFRDLLKKNMLDL  
 YMDDIVVHGETDIECLEKTKKVLETAAGLAVKWKKCLFLQQTITFLGH  
 LVENGRVSPGIEKVKAVKNFRVPKNVKGIAFLGLTGFFRKFYKGYAIEA  
 RPLTDLLRKDSRFEITERELSAFNELKEQLIKEPVLRIFEQGAKTELHTD  
 ASKIGFGGVLMQWCDEKLHPVYFWSKKTTESESQKHSYILEAKAVFLAVK  
 SSEGICWVYRSSLWLQIVTHSSRH

>|cl|ORF5 Blast (blastopia polyprotein - Drosophila melanogaster)

MYLQDFNFEVEHRPGTRLRHVDCLSRYP LRV MVVTSEITARIKNGQKDE  
MVKAICEILGERAYGAYHLKGGILYYAKDGQDLVVVPRGMQRQLIQEVHN  
NGHFGSQKTIHALMQQYWIPQIEQKVKQTIENCVRCILYNKKLGRKEGYL  
HPIGKGDKPLHTLHIDHVGPM DATSKQYRYILTMVDGFSKFVWLYPTKTT  
SAEETLRKLEGWSSVFGNAERVVTD RGA AFTA HAFSEYMRINGIEHVVCT  
TGVPRGNGQAERNR TLINMLAKLSIEPSK WFKDVPRVQRAINAHQ NAT  
TGKSPFELMFGVRMKNVTDNRLGEM LQQELYEEYEHDRRELREEARRAIE  
EAQTGYKADFDRKRKPQVGYATGDLVAIKRTQFVAGKKLASEFLGPYEVI  
KVNRRNGRYKVKRVAEGEGPLITSTSEDNMKLWRYVETHAEGLSDEEEEV

>Gypsy2\_Andl (sequence) Red = LTRs

ATGTAAGAATGTAAGTGTGGGCGTGAGCAAGGCAGAATGTAAGAGTGTATCG  
GTGAGAGCGAATCAAGGACAAAAGGGAAATAAAAGGAGAAATGGCGGGA  
GTGCGAGGTCACTCGTGAGTTGGAGTCCCTGAGATAAAGGTGTGCAAATTAT  
TTCAGTGTAAACATTTGGTGT CAGAAGTGGGATTAGGATCATTATCGTGACAAG  
GTGTGGTGAAAAGAACACCCTGAATAGTGATCTGTAATGGAGCCAACCGAA  
GCGTGTGGTAGCGGCGGGCGGCGGCGAGCGAGAGGCGCTTCAGAGGAAGT  
GCGGTGCTTGGACAGTGTTCGGCAAACGGAAGACAAACTCAGCTTGGACTC  
CAGCAGAGTCGACCAAGAGGCAGGAACCAAGATGACATCGATAGTTGGGAG  
GCCGAGGTCTACA ACTACGGCATCGTCCGTTAAAGGAAGGCGGGCAACATTA  
CAATTGCAAAGGCTCGAAGCTGAAAAGCGATCCAGCTAGAAAAGCTGAAA  
CTCGAGGAAGAGTTTATACGCGAAAAGTTTCGGCTTATGGAAGAACAGTTGT  
CGGAAGATGATGAAAGTGCGTCCATCGAAAATAGTACAGCACAAAAGGTGA  
CCAGCTGGATCACCAAGAGCCAGGCGACGATCACTTCGGACAAAGAAGGTG  
ACGTCACGCGAGAGATTCGGCGCATGCGAAACGAGCTAATAACACAAAGGC  
CGGTAGCCGAAGAACCAAAAAGAAAATGCGCAAACAACAAGCGTAGGTGCA  
GAAGTATCATTGTGGACGCTCACAAAAGAACA AAAAGGCGGCTCGACAAGCG  
CTGCCAAAAGATTTGCCGGAGTTCAACGGTGATCCCGCGGACTGGCCTACCT  
TCATCAGCAGCTTCAATTTCTCCACAAAAGCATGCGGATATCAAAAATGGGGA  
AAACATGATCAGGCTACAACGATGCCTGAAGGGTGCTGCGAAGGAAGCAGT

GAGAGGCCGACTTCTTCTTCCAGAATCAGTTCCGAGCGTCATCAATGCGTTA  
AAAAGACGTTTTGGACGGCCTGAATTGTTGCTTGAGATCATGATTGATCGNN  
NNNNNNNNNNNNNNNNNNNNNGAAAATTGGTGGTCGGCCGGTGAACGCGCTCT  
TCGACACGGGTAGCCAATACAACATGATTTTGGGAAGAAATATTGGAAACAAT  
AGGGGAGCCGGTGGTGGTTCCAACCGAAATGTGCTTTCTTGGGTTCCGGAGG  
AATACGAACAAAAGCACTGGGAAGAATAACAACCACAGTGTGTATTGGGCCT  
GAGGTCATGGAGATGATGTTCTATGTGGTGCCACGCGACAGTATGGGGTATGA  
GGCCATACTGGGAAGGGAGGTGTTGAGCGAAGTGGAAGCAAGAGTGACAC  
AGGAAAGAGTGGAGTTGGTACGGCGAAAAGTGGACGAAATCGAACCTACAG  
CGGAGACATTGTTGTGCATGGAGGAAGAAATAACAGTGCCAACGAAATATCG  
GAAAACAATAAGTGATCTGATTTCAAACCTGCGTGCCAGACAAAACAAAACA  
GTTTCGAGTCGTGTCCCGTGGAAATTGAAAATAGTGCCGGATGGACAATTAATTC  
CATGTCCGGACACACCACGCCAACTCGCGCACTCGGAGGAGAAAGCGGTAG  
ATCAGCAGGTGGAGGAATGGTTGCAGCAAGGAATCGTGCGTGAGTCAACCT  
CGGACTTTGCAAGCAAGGTGGTGGTAGTTAAGAAAAAGGACGGATCAAGCC  
GTGTGTGTGTGGACTATCGGAAACTGAACGCAGGGGTGTTAAAAGATGGTTT  
TCCTGTGCCAATAGTAGAAGAAGTATTGAACAAGTTGCAAAAAGCTAAGTGG  
TTTACAGTAATGGATTTGGCGAATGGGTTTTTTCACGTCCCGGTGGAGGAAG  
AGTCGAAAAAGTACACGGCGTTCGCAACTAAAAAGGGATTATTCGAGTTCAA  
TCGAGCTCCTTTCGGGTTTTGTAATTCGCCGGCGGCATTTATCCGGTTCGTTA  
ATTACGTGTTTCGCGACTTGCTAAAGAAAAATATGTTGGATTTGTACATGGAT  
GACATTGTGGTTCACGGCGAAACGGACATCGAGTGTTTGGAAAAAACAAAG  
AAAGTGCTGGAAACCGCAGCCAAGGCCGGTTTGGCGGTTAAGTGGAAAAAG  
TGTCTCTTTCTACAGCAAACGATCACTTTTCTGGGACACTTAGTCGAAAATGG  
ACGGGTTTCACCGGGAATAGAGAAAGTGAAGGCAGTGAAAAATTTCCGAGT  
CCCAAAAAACGTGAAAGGGATAACAAGCATTTTTAGGCTTAACTGGATTTTTC  
CGGAAGTTTATAAAAGGCTATGCGGAGATCGCCCGACCATTAACGGATTTACT  
GAGGAAGGATAGTCGTTTCGAAATAACTGAACGGGAGTTATCGGCATTTAAC  
GAGTTAAAAGAACAGTTAATAAAGGAACCTGTGCTGAGGATCTTTGAGCAGG  
GAGCGAAGACGGAGCTTCATACGGACGCTCAAAAATCGGATTTGGTGGAG  
TGTTAATGCAGTGGTGCACGAGAAGCTCCATCCAGTATACTTTTGGAGTAA  
GAAAACCTACCGAATCCGAATCACAAAAGCATAGTTACATCCTCGAAGCGAAA  
GCGGTGTTCTTGGCGGTAAAAAGTTCAGAAGGTATTTGTTGGGTGTACCGTT  
CAAGTTGGTTACAGATTGTAACGCATTCAAGCAGACACTAAGAAAAGCAGAC

GTGCCTAATGAAGTGTTACCATGGGTGATGTATCTGCAAGATTTTAATTTTGA  
GGTAGAACATCGTCCTGGAACGCGACTGCGCCACGTGGATTGTCTCAGTCGG  
TATCCGTTACGAGTAATGGTGGTTACATCCGAGATTACGGCGCGTATCAAAAA  
CGGTCAGCAAAAGGACGAAATGGTAAAAGCTATTTGTGAAATCTTAGGAGAA  
AGAGCGTATGGGGCGTATCATTTGAAAGGAGGGATTCTTTATTATGCTAAAGA  
CGGACAGGATTTAGTGGTGGTTCCACGAGGAATGCAAAGGCAGCTCATTAG  
GAAGTGCATAATAACGGACATTTCCGGTAGCCAGAAAACCTATCCACGCTCTGAT  
GCAACAGTACTGGATTCCCTCAAATCGAACAAAAAGTGAAACAAACAATCGA  
AAATTGCGTGAGGTGTATACTGTACAACAAGAAGTTAGGTCGTAAGGAAGGG  
TATCTTCACCCCATAGGGAAGGGTGATAAGCCGCTTCACACATTGCACATCGA  
TCACGTTGGACCAATGGATGCGACATCAAAGCAATACCGCTACATCCTAACA  
ATGGTGGACGGATTCAGCAAGTTCGTGTGGCTGTATCCTACAAAACTACCA  
GCGCAGAGGAGACATTGCGGAAACTCGAAGGATGGTCGTCAGTGTTTGGTA  
ACGCAGAACGAGTAGTGACTGATCGAGGGGCAGCATTACAGCGCACGCGT  
TTTCGGAGTATATGCGGATCAACGGGATCGAACACGTCGTCTGTACAACAGG  
TGTACCGAGGGGCAATGGGCAGGCGGAGAGAGTAAACCGCACGTTGATCAA  
CATGCTAGCTAAGCTCTCAATCGAAGAACCAGCAAATGGTTTAAAGATGTT  
CCCAGGGTTCAACGAGCCATTAACGCTCATCAGAATGCGACAACGGGAAAAT  
CGCCATTCGAGCTAATGTTTGGGGTGCGTATGAAAAATGTAACGGACAATAG  
ATTAGGAGAAATGCTACAACAGGAGTTGTATGAAGAGTATGAGCACGATAGA  
CGGGAATTGCGAGAGGAAGCTAGACGAGCGATCGAAGAAGCACAGACAGG  
GTACAAAGCGGATTTTGATAGGAAAAGGAAGCCGCAAGTAGGATATGCTACA  
GGAGACTTAGTAGCCATTA AAAAGGACACAATTTGTGGCGGGAAAAAAGTTA  
GCCAGCGAATTCCTAGGGCCATACGAGGTGATTAAGGTGAACCGCAACGGGC  
GGTACAAGGTCAAGAGGGTTGCGGAGGGTGAAGGACCTTTGATCACGTCAA  
CAAGTGAGGACAACATGAAGTTATGGCGATATGTAGAAACCCATGCCGAAGG  
GTTGTCAGATGAGGAGGAAGAGGTTTGACTAAGTGAAACGAAACATCGAGG  
ATCGATGTTAGTCAGGAAAGGCCGAATGTAAGAATGTAAGTGTGGGCGTGAG  
CAAGGCAGAATGTAAGAGTGTATCGGTGAGAGCGAATCAAGGCCAAAAGGG  
AAATAAAAAGGAGAAATGGCGGGAGTGCGGAGAACACTCGTGAGTTGGAGTC  
CCTGAGATAAAGGTGTGCAAATTATTCAGTGTAACAT

*Putatively active element*

The element has 4291 bp and LTRs with 184 bp. The ORF expand from nt 213..3941, coding a polyprotein with 1243 aa.

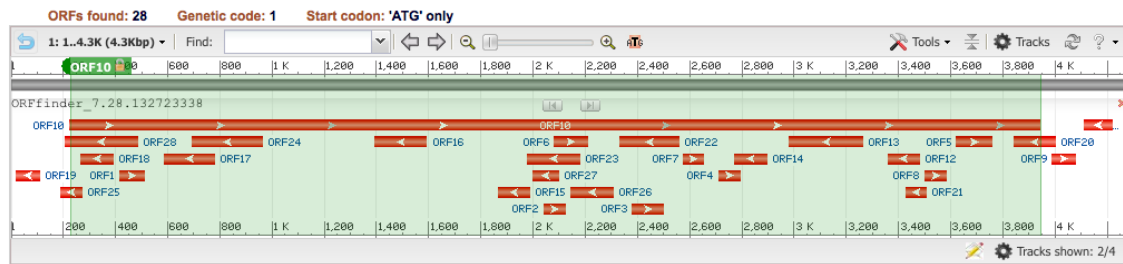

**Figure 36** - Orf Finder scheme of ORFs detected in the Copia1\_Andl element

CDS 213..3941

/product="Adg\_Copia-70\_AA-I\_1 polyprotein"

KQKMDSVRVIVPRLSNDNYASWSFKVQMLLQREDVWHAVEGGKPETVTTAWT  
 KANTKAKAIIGLHIEDDQITLIRDCEDAKSAWEALKKFHDNVSEVYLLKKLTSLT  
 LAEQSMSEQHLSTFSELIQRIGASGESIPRKWQVAMLLCSLPPSYDPLTTAIELTNI  
 NELTVESVKSLLAEAEKRKERAGNIESENEKAMRSEVFRRNKKPAGVVCYNC  
 NKPGHLKRNCRLRNDEAKRVENNNEKPAEECAFTISQEEATEWYVDSGASRH  
 MTGNKEFFNQFSATNMGTVTLANGQKTRINGTGRGTLICTDSEGKPRSILLSDV  
 LYVPKLTSGLISVRSLTRKGMTVLFTGEQCRIKGENKEVIATASSGSLYKLHTTEK  
 ALKGLFQTHHEKCIHSLHRRFGHRECGVIEKMCKESGLKVKDCRIKSKCEICK  
 SKMSRKPFPKKSFSSETSEILQLIHTDISGPFCTVSGYKYMCIIDDYSRMTFLYL  
 LKHKSEAEDKIREFVAFCKTQIGKTPRVIRSDNGGEYTG NQLKNFLKREGIVSQL  
 TAPYSPQQNGVAERKNRYIQEMVRCMLADAKMEKKFWGEAALTATYIQNRLPT  
 TATGMTPYERWYGQKPSYDHFRIFGCEAWVHIPKERRNKMNSKAERLRFVGY  
 KEQKAYRFVNEDTSKIVISRDAVFKENFNHPSWNEDILKKNKMRNQDHDIGETD  
 DISDVDSCVSNESDAVSDDAFEDANGVFPSESEDLPSTTDRPTRENRGKPPAYLD  
 DYIVGIAKSEDIPTS WQEAMKSSHDEWKEAMDAEMFSHEKNSTWEVTELP

DKKAIGCRWVFKLKKDELGNVVRFKARLVAQGFNQQYGVDYDEFAPVTRFN  
TIRVFLTICGRDRLIAKHLDVATAYLHGDIKEEIYMRQPPGYSLTGQGTKVCKLK  
RSIYGLKQAARCWNQKLCGVLESIGFKASVTDPCLFMRIKDNSKMYLVTYVDD  
LLVACKNENEIDNVYTELKKHFEINMLGDVKNFLGVQIIKNQDGILSLSMTRHID  
ELALKFGLEKAKVARTPMDSGYLKCTDRQDMFEDNNKYRSIVGSLMYIANCGR  
PDIAASASILGRKLECPKTDWVAAKRVVRYLIGTRDWCLRLGDGKARCVLEV  
YTDADWAGDHATRSTTGYVLFYGGGAVAWGSRRQNCVSLSSMEA EYVAITES  
CQETLWIRLLRDLGEEQLGATFIHEDNQGCISFAQSGKISKRSKHIETRNSLSVT

> Copia1\_Andl (sequence)

TGTTAAATAACAACGTTTATTTAACTCGCGTCAGGCAGCACTGCCAAAACCG  
GCAGCACTGGTCAGTACTTGTGTGTCAAGTCTTAACAACACTGTGCGGTCAGT  
CTTTGCATAGTTCTAGAATAAAGACCGTGCTCTGTAGAGCCAAGTGTTTTCCG  
CGTTTGATTTGACCTAAATATTAACAGGTTATGGGCCAGCAGTGCTAACGT  
GAAAACAAAAGATGGATTCGGTACGAGTAATAGTGCCAAGGTTGTCGAACG  
ACAACACTACGCATCGTGGAGTTTCAAGGTACAAATGCTCTTGCAGCGTGAGGA  
CGTGTGGCATGCAGTGGAAGGCGGTAAGCCAGAGACAGTTACAACAGCATG  
GACAAAAGCAAACACGAAGGCGAAAGCCATAATTGGTCTGCATATTGAGGAT  
GACCAAATCACGCTTATCAGAGATTGTGAAGATGCAAAAAGTGCGTGGGAA  
GCCCTTAAAAAGTTTCATGATAACGTATCGGAGGTGTATTTGTTAAAGAAATT  
AACATCCCTCACGCTGGCAGAAGGCCAGAGCATGGAACAGCACCTGTCCAC  
TTTCAGCGAGTTGATTCAAAGAATCGGTGCCTCGGGCGAATCCATTCCCAGA  
AAGTGGCAGGTGGCGATGCTTCTTTGTTCACTTCCCCCCTCGTACGACCCGCT  
CACAACGGCCATCGAGCTCACGAATATAAACGAGCTAACAGTGGAGAGCGT  
GAAGTCGAAGTTGCTGGCAGAAGCCGAAAAGAGAAAAGAGAGGGGCGGGAA  
ACATCGAGAGCGAGAACGAGAAAGCAATGAGGAGTGAAGTTTTTCGCAGAA  
ATAAGAAACCGGCGGGAGTCGTTTGTATAATTGTAACAAGCCGGGACACCT  
GAAGAGAAATTGCCGTCTGCTGAGAAATGATGAAGCAAACGAGTGGAGAA  
CAACAACGAAAAGCCCGCAGAAGAGTGTGCATTTACAATAAGCCAGGAAGA  
AGCTACCGAATGGTACGTAGATAGTGGGGCTTCAAGGCATATGACCGGTAAC  
AAGGAATTTTTCAATCAATTCTCAGCAACAAACATGGGCACAGTGACACTCG  
CGAACGGCCAAAAGACCAGAATCAATGGAACCTGGTAGAGGCACCCTAATATG

CACCGACAGCGAAGGAAAACCAAGATCGATCCTTCTCTCTGATGTACTTTAT  
GTACCGAAACTAACAAGTGGACTAATATCCGTAAGATCTCTCACGCGAAAAG  
GAATGACCGTGCTATTTACAGGTGAACAGTGCAGGATAAAAGGAGAAAATAA  
AGAAGTTATAGCCACAGCTAGTAGTGGAAAGTTTATATAAACTTCATACAACAG  
AAAAGGCACTCAAGGGTTTATTTCAAACACACCACGAAAAATGTATTCACAG  
CCTGCACAGGAGATTCGGCCACCGAGAATGTGGTGTAATAGAAAAGATGTGT  
AAAGAAAGTGGATTAAAGGTAAAGGACTGCAGAATAAAATCAAATGCGAG  
ATTTGTCTAAAAAGTAAAATGTCAAGAAAACCCTTTCCGAAAAAGTCCTTTT  
CAGAGACCAGCGAGATACTGCAGTTGATCCACACCGACATCAGTGGACCTTT  
TGGCTGTACAGTGAGTGGATACAAGTACTATATGTGCATAATAGACGATTATAG  
CAGAATGACGTTCCCTATACTTGTTAAAACACAAATCGGAAGCAGAGGACAAG  
ATTCGTGAGTTCGTAGCCTTCTGCAAAACGCAAATTGGGAAAACACCACGAG  
TGATACGTTCCGACAATGGAGGAGAGTATACAGGAAATCAGTTGAAAAATTT  
CCTGAAACGCGAAGGTATTGTCAGCCAACTAACAGCACCATATTCACCTCAA  
CAAACGGAGTCGCTGAAAGGAAAAATAGATACATACAAGAAATGGTGCGG  
TGTATGCTAGCAGATGCAAAAATGGAAAAGAAATTTGGGGCGAAGCGGCTT  
TAACAGCTACGTACATACAAAACCGCTTACCCACCACAGCGACGGGAATGAC  
GCCTTACGAAAGATGGTATGGACAAAACCATCTTATGATCATTTCGCATATT  
TGGATGCGAGGCGTGGGTGCATATTCCCAAAGAGAGGCGGAACAAAATGAA  
TTCCAAAGCAGAACGCCTAAGATTTGTTGGATACTCCAAAGAACAAAAAGC  
ATATCGATTCGTCAACGAAGATACAAGTAAAATTGTGATCAGCCGCGATGCAG  
TTTTCAAAGAAAACCTTTAATCACCCCTTCGTGGAATGAAGACATCTTGAAGAA  
GAACAAAATGCGAAATCAAGATCATGATATCGGAGAAACCGACGACATCAGT  
GACGTTGATTCGTGTGTTTCAAACGAATCAGATGCTGTGAGTGATGATGCTTT  
CGAAGACGCAAATGGTGTTTTTCCTTCGGAATCTGAGGATCTACCATCAACC  
ACAGATCGACCAACACGAGAAAACAGAGGGAAGCCACCAGCGTACTTGGAC  
GACTATATAGTCGGGATTGCCAAGAGCGAAGATATAGAACCGACATCCTGGC  
AAGAAGCGATGAAGTCATCACATCATGACGAATGGAAAGAGGCTATGGACGC  
AGAAATGTTTTACACGAGAAGAACAGCACATGGGAGGTAACCGAGCTACC  
TCCTGACAAGAAAGCGATCGGATGCAGATGGGTCTTCAAATTAAGAAAGAT  
GAACTAGGAAATGTGGTACGTTTTAAGGCCAGATTGGTGGCCCAAGGTTTCA  
ATCAACAATACGGTGTGGACTATGATGAACTTTCGCACCAGTGACGCGTTT  
CAACACCATTCGTGTATTCCTGACGATATGTGGAAGAGACCGTTTGATCGCCA  
AACACCTTGATGTGGCTACAGCATATCTGCACGGGGACATCAAAGAAGAAAT

CTACATGCGTCAACCTCCTGGATATTCCTGACCGGACAAGGAACTAAAGTAT  
GTAAGTTGAAAAGAAGTATCTACGGATTGAAACAGGCAGCGAGGTGCTGGA  
ACCAGAAGTTATGTGGTGTCTGGAAAGTATTGGATTCAAGGCTAGTGTA  
ACTGATCCATGTTTGTTCATGCGTATTAAGATAATTCAAAAATGTATCTGGTCACA  
TATGTTGACGACTTACTAGTAGCATGTAAGAATGAAAATGAAATCGATAACGT  
ATATACAGAATTGAAGAAACACTTTGAGATAAATATGTTAGGTGATGTTAAGA  
ATTTTTTAGGAGTACAAATCATCAAAAACCAGGACGGCATTCTTAGTTTGAGT  
ATGACACGTCATATAGATGAACTTGCCTTAAAGTTCGGTTTAGAGAAGGCAA  
AGGTGGCGCGTACTCCTATGGATTCAGGTTACCTCAAATGCACGGATAGGCA  
AGATATGTTCTGAAGACAATAACAAATACCGTAGCATAGTAGGTTCACTTATGT  
ACATAGCAAATTGTGGAAGACCGGATATAGCAGCAAGCGCATCCATACTAGG  
TAGAAAACCTTGAATGTCCATCGAAAACGGATTGGGTGGCAGCGAAAAGAGT  
AGTGCGTTACTTAATAGGGACACGCGACTGGTGTTTAAGATTAGGTGACGGG  
AAGGCTCGATGCGTTTTAGAAGTATATACGGATGCTGATTGGGCAGGAGATCA  
TGCCACGAGAAAATCTACAACAGGCTACGTCCTTTTTTATGGAGGAGGAGCT  
GTTGCGTGGGGTAGTCGTCGACAAAATTGCGTTAGTCTTTCGTCGATGGAGG  
CTGAATATGTAGCTATAACCGAATCATGCCAGGAACTTTATGGATACGTAGAT  
TACTGAGGGACTTAGGTGAAGAACAGTTAGGCGCCACTTTTATACACGAAGA  
TAATCAAGGCTGTATAAGTTTCGCGCAATCTGGAAAAATAAGCAAGCGGTCC  
AAGCACATAGAGACAAGGAATTCTTTGTCCGTGACTTAATCGACAGGAAGGA  
AATTGAACTAAGGTACTGTCCTACGGAGGACATGATAGCAGACATATTA  
ACTAAGCCTTAGGGAATATAAAACACAAGAAGTTCTCATTATCATTAGGACTAACG  
GATCCAGTTAATTAACGTTGAGGAGGAGTGTTAAATAACAACGTTTATTTAA  
CTCGCGTCAGGCAGCACTGCCAAAACCGGCAGCACTGCCAAAACCGGCAGC  
ACTGGTCAGTACTTGTGTCAAGTCTTAACAACACTGCGCGGTCTGTCTTTGC  
ATAGTTCTAGAATAAAGACCGTGCTCTGTAGAGCCAAGTGTTTTCCGCGTTTG  
ATTCGACCTAAATATTAACA
